# Supplementary material
Source: PubMed Central journal article supplement (PMC7482266)
Supplement: rspb20201379supp1.pdf [file rspb20201379supp1.pdf]

Electronic Supplementary Material

Reduced thermal tolerance of massive coral species in a highly variable environment

Klepac, CN, Barshis DJ

Old Dominion University, Department of Biology, Norfolk VA, USA

Email: [cklep001@odu.edu](mailto:cklep001@odu.edu)

Proceedings of the Royal Society B

DOI: [10.1098/rspb.2020.1379](https://doi.org/10.1098/rspb.2020.1379)

## Methods

### Symbiodiniaceae physiology under heat stress

Junior PAM instrument settings were as follows: Measuring Light Intensity = 6; Saturation Intensity = 12; Saturation Pulse Width = 0.6s; Gain = 2.

### Symbiodiniaceae sequencing

Symbiodiniaceae was identified to the lowest taxonomic level using a 350 bp segment of the internal transcribed spacer region 2 (ITS2) rDNA. ITS2 was amplified using specific primers, ITS-Dino-forward [5'-GTGAATTGCAGAACTCCGTG-3'; 1] and its2rev2-reverse [5'-CCTCCGCTTACTTATATGCTT-3'; 2]. PCR reactions (20µl) consisted of the same reagents and volumes used for coral host PCR, except 0.2µl of 10µM forward and reverse primers was used. PCR cycles were run using the following profile: 95 °C for 5 min, followed by 22-37 cycles of 95 °C for 40s, 59 °C for 2 min, 72 °C for 30s, then a final extension of 7 min at 72 °C. To minimize the number of PCR cycles for each sample, PCR cycle checking [3] of final cycle number was performed and reactions were stopped when a faint band appeared following 1% EtBr agarose gel electrophoresis. Individual samples that did not amplify by 35 cycles were removed from analysis.

PCR products were cleaned with ExoSAP-IT prior to a second series of PCRs to incorporate sequencer primers and unique barcode sequences to each sample using Illumina's Nextera XT Adapter Kit [sensu 4, 5]. Each primer contained a universal linker, for downstream incorporation of Illumina adapters and barcodes, and four degenerate bases, denoted as N. The forward ('5'-GTCTCGTCCGCTCGG + AGATGTGTATAAGAGACAG + NNNN) and reverse primer linker (5'-TCGTCGGCAGCGTCA + AGATGTGTATAAGAGACAG + NNNN) preceded the ITS2 forward and reverse primer sequences. Following barcoding PCR, samples were visualized on a 1% EtBr agarose gel and pooled based on band intensity. The resulting pool was again run on a 1% stained gel for 30 min, the target band excised, then cleaned using a QIAquick® Gel Extraction Kit (QIAGEN, MD). The pooled sample was sequenced on ODU's Illumina MiSeq (250bp paired-end Reagent Nano Kit v2). Samples were sequenced in two batches, the first in February and the second in November 2017.

The first ITS2 MiSeq sequencing run yielded 485,867 raw reads from 78 samples, and the second sequencing run yielded only 2,554 forward raw reads from 58 samples. Therefore, we incorporated only the forward reads from the second run with the initial sequence data. Sequenced raw reads were demultiplexed, and trimmed of barcodes, adapters, linkers, ITS2

primers, and degenerate bases. Distinct amplicon sequence variants (ASVs), a similar, but higher-resolution analog of traditional Operational Taxonomic Units (OTUs) were identified and a resulting abundance count for each ASV/sample produced using the R program DADA2.1.8.0 [6]. After filtering, denoising, and pooling positively correlated ASVs, DADA2 produced a final read abundance table containing 13 unique ASVs (Table S7). Each ASV representative sequence was identified by via BLASTN comparison to the Geosymbio Symbiodiniaceae reference database [Table S7C; 7] and Santos lab reference database (Table S7C; <http://webhome.auburn.edu/~santosr/sequencedatasets.htm>), and confirmed via BLASTN against NCBI's nt database. All ASV's matched one or more reference sequences with an evalue below  $3E^{-16}$ , thus top hits were considered matches.

Symbiodiniaceae ASV abundance analysis used the R package MCMC.OTU as described in Green, Davies [5]. Samples were first subset by coral host species, and then outlier and rare (< 0.1% of the global sum of counts) ASVs and samples with low sequence coverage were identified and removed. Remaining ASVs were run through the MCMC.OTU model, with fixed effects for origin site, destination site, and time. Pairwise differences between all fixed effect combinations were calculated and adjusted using the false discovery rate (FDR). Count data were further filtered to retain ASV's detected in > 10% of all samples. A PERMANOVA was carried out on transformed ASV counts using the ADONIS function of the R package VEGAN [8].

## Figures and Tables

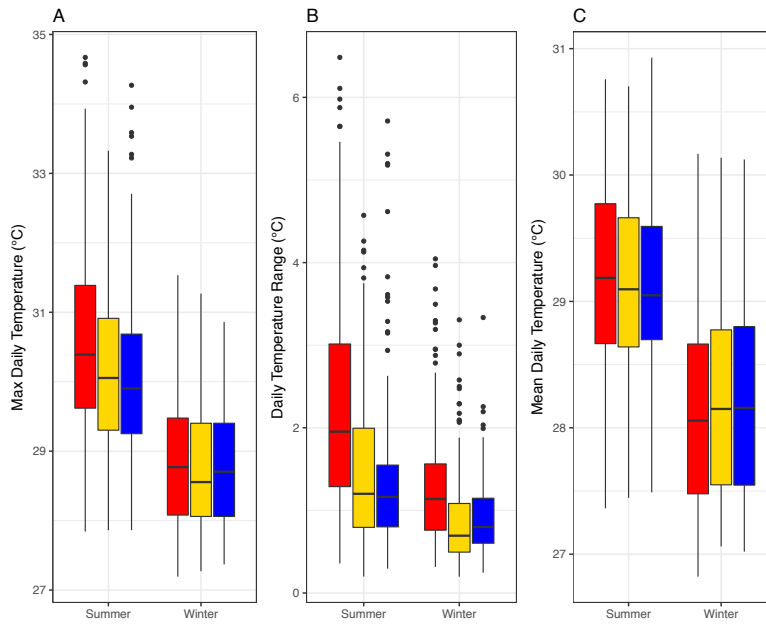

**Figure S1.** Seasonal distribution of Ofu's three backreef pools *in situ* thermal regimes. A. Daily max temperatures, B. daily temperature range, and C. daily mean temperatures of the HV (red), MV (gold), and LV (blue) pools collected during this study (July 2015 – June 2016). Winter includes the months April-October, and summer includes October-April. Boxplots constructed using ggplot2's geom\_boxplot display the median, hinges (first and third quartile), and whiskers (largest/smallest value no further than 1.5\*IQR).

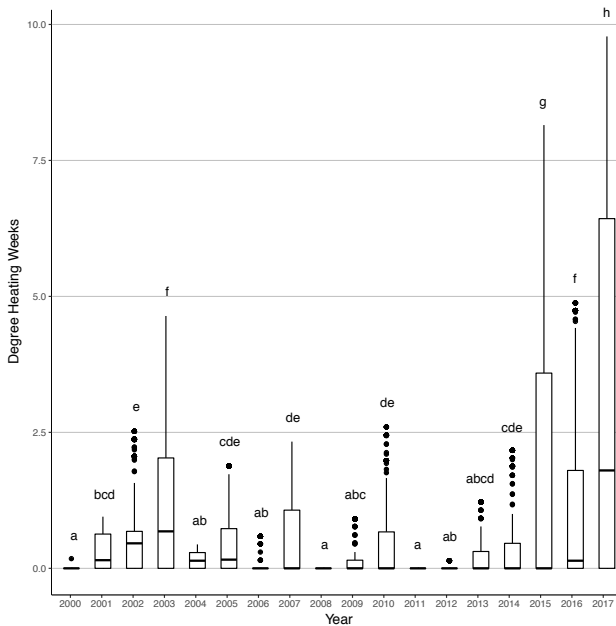

**Figure S2.** Distribution of the Degree Heating Weeks (DHW) of Ofu Island spanning 2000-2017. Letters indicate Tukey's post-hoc pairwise comparisons.

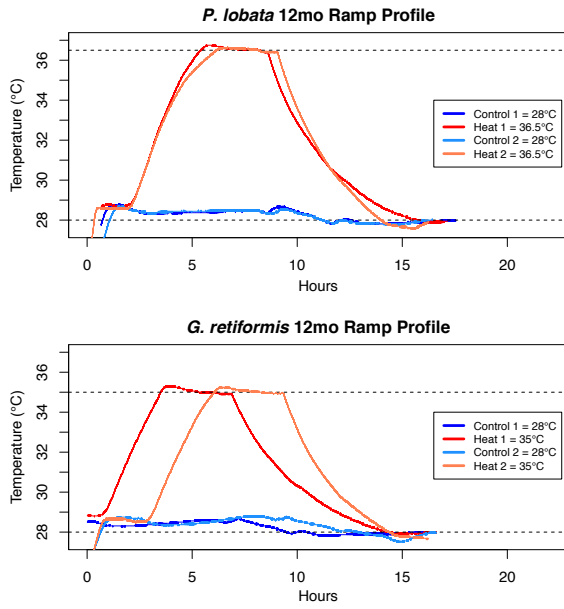

**Figure S3.** Thermal profile of acute heat stress assays.

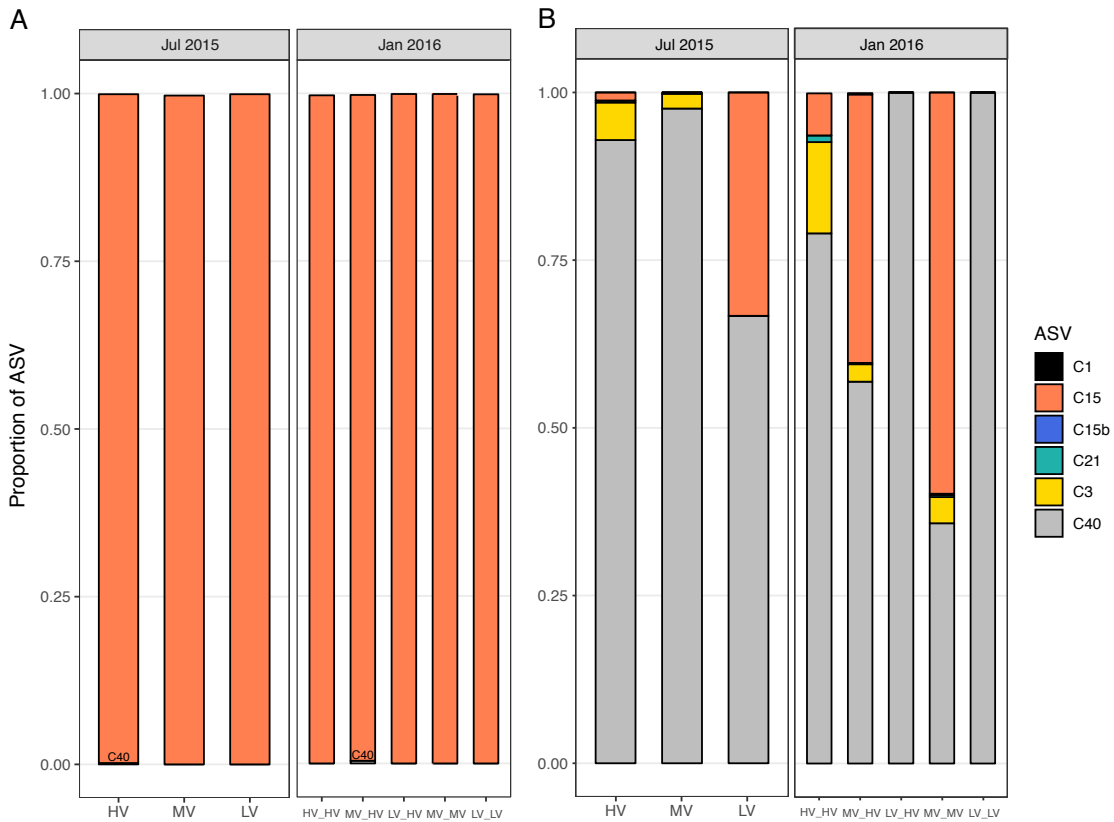

**Figure S4.** Relative proportion of Amplicon Sequence Variants (ASVs) belonging to *Cladocopium* spp. ITS2 types found in *P. lobata* (A) and *G. retiformis* (B). July 2015 panels represent community composition averaged over donor colonies in each backreef site, and January 2016 panels represent ASV proportions averaged for each transplant group.

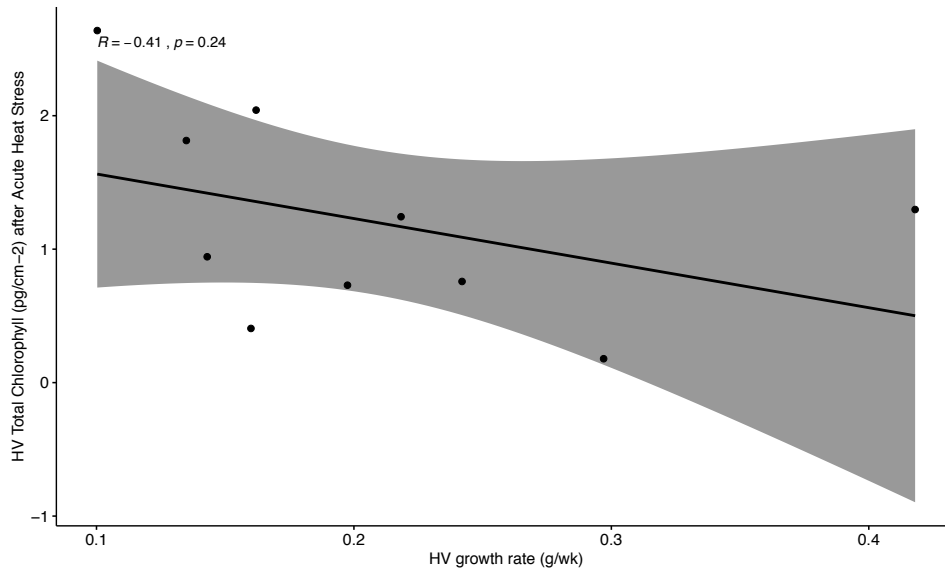

**Figure S5.** Pearson’s correlation between HV pool *P. lobata* weekly growth rate and total chlorophyll after acute heat stress.

**Table S1.** Ofu Island backreef pool seasonal temperature summary.

| Site | Season                     | Water Temperature (°C) |      |       |      |       |      |      |      |        |
|------|----------------------------|------------------------|------|-------|------|-------|------|------|------|--------|
|      |                            | Mean                   | SD   | Max   | SD   | Min   | SD   | DTR  | SD   | maxDTR |
| HV   | Winter 2015 (Oct-Apr)      | 28.12                  | 0.76 | 28.81 | 0.95 | 27.53 | 0.81 | 1.29 | 0.72 | 4.045  |
|      | Summer 2015-16 (Apr - Oct) | 29.19                  | 0.63 | 30.64 | 0.9  | 28.34 | 0.68 | 2.3  | 0.82 | 6.484  |
|      | Annual                     | 28.63                  | 0.94 | 29.68 | 1.51 | 27.91 | 0.91 | 1.77 | 1.19 |        |
| MV   | Winter 2015 (Oct-Apr)      | 28.02                  | 0.72 | 28.57 | 0.83 | 27.7  | 0.73 | 0.88 | 0.51 | 3.307  |
|      | Summer 2015-16 (Apr - Oct) | 29.15                  | 0.78 | 30.13 | 1.08 | 28.61 | 0.8  | 1.51 | 0.92 | 4.572  |
|      | Annual                     | 28.66                  | 0.9  | 29.4  | 1.19 | 28.23 | 0.86 | 1.17 | 0.82 |        |
| LV   | Winter 2015 (Oct-Apr)      | 28.22                  | 0.77 | 28.8  | 0.85 | 27.88 | 0.85 | 0.92 | 0.42 | 3.335  |
|      | Summer 2015-16 (Apr - Oct) | 29.15                  | 0.79 | 30.05 | 1.17 | 28.68 | 0.79 | 1.37 | 0.95 | 5.714  |
|      | Annual                     | 28.66                  | 0.9  | 29.4  | 1.19 | 28.26 | 0.88 | 1.14 | 0.76 |        |

**Table S2.** Weekly growth rate summary for *P. lobata* and *G. retiformis*.

| Species              | Time   | Origin_Dest | Mean  | SD    | n |
|----------------------|--------|-------------|-------|-------|---|
| <i>P. lobata</i>     | 16-Jan | HV_HV       | 0.165 | 0.06  | 5 |
|                      |        | MV_HV       | 0.068 | 0.029 | 5 |
|                      |        | MV_MV       | 0.083 | 0.05  | 5 |
|                      |        | LV_HV       | 0.088 | 0.054 | 4 |
|                      |        | LV_LV       | 0.106 | 0.054 | 5 |
|                      | 16-Jul | HV_HV       | 0.272 | 0.135 | 5 |
|                      |        | MV_HV       | 0.125 | 0.047 | 4 |
|                      |        | MV_MV       | 0.249 | 0.049 | 4 |
|                      |        | LV_HV       | 0.07  | 0.054 | 4 |
|                      |        | LV_LV       | 0.177 | 0.051 | 5 |
| <i>G. retiformis</i> | 16-Jan | HV_HV       | 0.074 | 0.019 | 5 |
|                      |        | MV_HV       | 0.047 | 0.009 | 5 |
|                      |        | MV_MV       | 0.062 | 0.011 | 5 |
|                      |        | LV_HV       | 0.071 | 0.014 | 5 |
|                      |        | LV_LV       | NA    | NA    | 0 |
|                      | 16-Jul | HV_HV       | 0.088 | 0.021 | 5 |
|                      |        | MV_HV       | 0.063 | 0.026 | 5 |
|                      |        | MV_MV       | 0.129 | 0.034 | 5 |
|                      |        | LV_HV       | 0.068 | 0.032 | 5 |
|                      |        | LV_LV       | 0.04  | 0.027 | 4 |

**Table S3.**  $F_vF_m$  and total chlorophyll summary for *P. lobata* and *G. retiformis*.

| Species              | Time    | Origin_Dest | Treatment | $F_vF_m$ |       |       | Total Chlorophyll |       |   |
|----------------------|---------|-------------|-----------|----------|-------|-------|-------------------|-------|---|
|                      |         |             |           | Mean     | SD    | n     | Mean              | SD    | n |
| <i>P. lobata</i>     | 16-Jan  | HV_HV       | control   | 0.88     | 0.02  | 5     | 6.505             | 2.217 | 5 |
|                      |         |             | heat      | 0.563    | 0.069 | 5     | 1.437             | 0.804 | 5 |
|                      |         | MV_HV       | control   | 0.887    | 0.058 | 5     | 4.737             | 1.539 | 5 |
|                      |         |             | heat      | 0.788    | 0.024 | 5     | 3.415             | 1.37  | 5 |
|                      |         | LV_HV       | control   | 0.87     | 0.034 | 4     | 8.272             | 1.965 | 4 |
|                      |         |             | heat      | 0.664    | 0.164 | 4     | 3.459             | 1.27  | 4 |
|                      |         | MV_MV       | control   | 0.894    | 0.05  | 5     | 4.639             | 2.367 | 5 |
|                      |         |             | heat      | 0.811    | 0.061 | 5     | 2.93              | 1.625 | 5 |
|                      |         | LV_LV       | control   | 0.865    | 0.029 | 5     | 11.831            | 3.415 | 5 |
|                      |         |             | heat      | 0.551    | 0.13  | 5     | 5.122             | 3.014 | 5 |
|                      | 16-Jul  | HV_HV       | control   | 0.969    | 0.036 | 5     | 3.715             | 0.849 | 5 |
|                      |         |             | heat      | 0.433    | 0.19  | 5     | 0.973             | 0.742 | 5 |
|                      |         | MV_HV       | control   | 0.951    | 0.019 | 4     | 3.502             | 1.3   | 4 |
|                      |         |             | heat      | 0.66     | 0.119 | 4     | 2.197             | 1.284 | 4 |
| LV_HV                | control | 0.936       | 0.037     | 3        | 3.534 | 1.629 | 3                 |       |   |
|                      | heat    | 0.547       | 0.186     | 3        | 1.75  | 0.753 | 3                 |       |   |
| MV_MV                | control | 0.942       | 0.02      | 5        | 4.967 | 1.2   | 5                 |       |   |
|                      | heat    | 0.772       | 0.12      | 5        | 2.87  | 0.962 | 5                 |       |   |
| LV_LV                | control | 0.939       | 0.019     | 4        | 6.414 | 0.911 | 4                 |       |   |
|                      | heat    | 0.679       | 0.131     | 4        | 4.642 | 0.51  | 4                 |       |   |
| <i>G. retiformis</i> | 16-Jan  | HV_HV       | control   | 0.913    | 0.028 | 4     | 5.746             | 1.118 | 5 |
|                      |         |             | heat      | 0.856    | 0.038 | 4     | 3.825             | 0.593 | 5 |
|                      |         | MV_HV       | control   | 0.936    | 0.033 | 5     | 5.966             | 0.509 | 5 |
|                      |         |             | heat      | 0.902    | 0.039 | 5     | 4.259             | 0.9   | 5 |
|                      |         | LV_HV       | control   | 0.934    | 0.037 | 5     | 5.457             | 0.953 | 3 |
|                      |         |             | heat      | 0.832    | 0.049 | 5     | 3.811             | 1.003 | 3 |
|                      | MV_MV   | control     | 0.893     | 0.02     | 5     | 5.814 | 0.679             | 5     |   |
|                      |         | heat        | 0.868     | 0.063    | 5     | 3.776 | 0.818             | 5     |   |
|                      | 16-Jul  | HV_HV       | control   | 0.959    | 0.032 | 5     | 7.544             | 0.705 | 5 |
|                      |         |             | heat      | 0.743    | 0.122 | 5     | 4.762             | 0.904 | 5 |
|                      |         | MV_HV       | control   | 0.94     | 0.034 | 5     | 8.171             | 1.242 | 5 |
|                      |         |             | heat      | 0.722    | 0.108 | 5     | 4.096             | 1.097 | 5 |
|                      |         | LV_HV       | control   | 0.892    | 0.036 | 5     | 7.471             | 1.746 | 5 |
|                      |         |             | heat      | 0.783    | 0.058 | 5     | 2.987             | 1.013 | 5 |
| MV_MV                | control | 0.936       | 0.048     | 5        | 7.89  | 1.654 | 5                 |       |   |
|                      | heat    | 0.712       | 0.136     | 5        | 5.223 | 3.292 | 5                 |       |   |
| LV_LV                | control | 0.948       | 0.038     | 3        | 5.619 | 2.643 | 3                 |       |   |
|                      | heat    | 0.765       | 0.101     | 3        | 3.577 | 0.85  | 3                 |       |   |



1. Pochon X., Pawlowski J., Zaninetti L., Rowan R. 2001 High genetic diversity and relative specificity among Symbiodinium-like endosymbiotic dinoflagellates in soritid foraminiferans. *Marine Biology* **139**(6), 1069-1078.
2. Stat M., Pochon X., Cowie R.O., Gates R.D. 2009 Specificity in communities of Symbiodinium in corals from Johnston Atoll. *Marine Ecology Progress Series* **386**, 83-96.
3. Quigley K.M., Davies S.W., Kenkel C.D., Willis B.L., Matz M.V., Bay L.K. 2014 Deep-sequencing method for quantifying background abundances of *Symbiodinium* types: exploring the rare *Symbiodinium* biosphere in reef-building corals. *PloS one* **9**(4), e94297.
4. Kenkel C.D., Goodbody-Gringley G., Caillaud D., Davies S.W., Bartels E., Matz M.V. 2013 Evidence for a host role in thermotolerance divergence between populations of the mustard hill coral (*Porites astreoides*) from different reef environments. *Molecular ecology* **22**(16), 4335-4348. (doi:10.1111/mec.12391).
5. Green E.A., Davies S.W., Matz M.V., Medina M. 2014 Quantifying cryptic Symbiodinium diversity within *Orbicella faveolata* and *Orbicella franksi* at the Flower Garden Banks, Gulf of Mexico. *PeerJ* **2**, e386.
6. Callahan B.J., McMurdie P.J., Rosen M.J., Han A.W., Johnson A.J.A., Holmes S.P. 2016 DADA2: high-resolution sample inference from Illumina amplicon data. *Nature methods* **13**(7), 581.
7. Franklin E.C., Stat M., Pochon X., Putnam H.M., Gates R.D. 2012 GeoSymbio: a hybrid, cloud-based web application of global geospatial bioinformatics and ecoinformatics for Symbiodinium–host symbioses. *Molecular ecology resources* **12**(2), 369-373.
8. Oksanen J., Blanchet F.G., Kindt R., Legendre P., Minchin P.R., O'hara R., Simpson G.L., Solymos P., Stevens M.H.H., Wagner H. 2011 vegan: Community ecology package. *R package version*, 117-118.

**Table S4 Ofu Temperature**

**A. Ofu Pools Max Daily Temperatures**

| <b>ANOVA</b>             |                    |      |           |          |          |                  |
|--------------------------|--------------------|------|-----------|----------|----------|------------------|
| Model: max ~ site*season | Factor             | Df   | Sum Sq    | Mean Sq  | F value  | Pr(>F)           |
|                          | <b>site</b>        | 2    | 20.8600   | 10.4300  | 9.1371   | <b>0.0001157</b> |
|                          | <b>season</b>      | 1    | 634.2100  | 634.2100 | 555.5856 | <b>&lt;.0001</b> |
|                          | <b>site:season</b> | 2    | 17.5700   | 8.7800   | 7.6950   | <b>0.0004792</b> |
|                          | Residuals          | 1139 | 1300.1900 | 1.1400   |          |                  |

  

| <b>Tukey's Test</b> |                            |          |        |           |         |                  |
|---------------------|----------------------------|----------|--------|-----------|---------|------------------|
|                     | Contrast                   | Estimate | SE     | Df        | t-ratio | p-value          |
| site                | <b>HV - LV</b>             | 0.3039   | 0.0772 | 1139.0000 | 3.9350  | <b>0.0003000</b> |
|                     | <b>HV - MV</b>             | 0.2950   | 0.0775 | 1139.0000 | 3.8080  | <b>0.0004000</b> |
|                     | LV - MV                    | -0.0090  | 0.0776 | 1139.0000 | -0.1160 | 0.9926           |
| season              | <b>Summer-Winter</b>       | 1.4890   | 0.0632 | 1139.0000 | 23.5510 | <b>&lt;.0001</b> |
| site*season         | <b>HV_Summer-LV_Summer</b> | 0.5930   | 0.1117 | 1139.0000 | 5.3090  | <b>&lt;.0001</b> |
|                     | <b>HV_Summer-MV_Summer</b> | 0.5182   | 0.1123 | 1139.0000 | 4.6130  | <b>0.0001000</b> |
|                     | LV_Summer-MV_Summer        | -0.0748  | 0.1123 | 1139.0000 | -0.6660 | 0.9856           |
|                     | HV_Winter-LV_Winter        | 0.0149   | 0.1067 | 1139.0000 | 0.1400  | 1.000            |
|                     | HV_Winter-MV_Winter        | 0.0718   | 0.1067 | 1139.0000 | 0.6730  | 0.9849           |
|                     | LV_Winter-MV_Winter        | 0.0569   | 0.1071 | 1139.0000 | 0.5310  | 0.9949           |
|                     | <b>HV_Summer-HV_Winter</b> | 1.8305   | 0.1090 | 1139.0000 | 16.7880 | <b>&lt;.0001</b> |
|                     | <b>LV_Summer-LV_Winter</b> | 1.2524   | 0.1094 | 1139.0000 | 11.4450 | <b>&lt;.0001</b> |
|                     | <b>MV_Summer-MV_Winter</b> | 1.3841   | 0.1101 | 1139.0000 | 12.5760 | <b>&lt;.0001</b> |

**B. Ofu Pools Min Daily Temperatures**

| <b>ANOVA</b>             |               |    |          |          |          |                  |
|--------------------------|---------------|----|----------|----------|----------|------------------|
| Model: min ~ site*season | Factor        | Df | Sum Sq   | Mean Sq  | F value  | Pr(>F)           |
|                          | <b>site</b>   | 2  | 28.2500  | 14.1240  | 22.3507  | <b>&lt;.0001</b> |
|                          | <b>season</b> | 1  | 174.6300 | 174.6260 | 276.3347 | <b>&lt;.0001</b> |
|                          | site:season   | 2  | 0.3700   | 0.1860   | 0.2938   | 0.7455           |

Residuals 1139 719.7700 0.6320

|             | Contrast                   | Estimate | SE     | Df        | t-ratio | p-value          |
|-------------|----------------------------|----------|--------|-----------|---------|------------------|
| site        | <b>HV - LV</b>             | -0.3446  | 0.0575 | 1139.0000 | -5.9960 | <b>&lt;.0001</b> |
|             | <b>HV - MV</b>             | -0.3133  | 0.0576 | 1139.0000 | -5.4370 | <b>&lt;.0001</b> |
|             | LV - MV                    | 0.0312   | 0.0577 | 1139.0000 | 0.5410  | 0.8510           |
| season      | <b>Summer-Winter</b>       | 0.7817   | 0.0470 | 1139.0000 | 16.6170 | <b>&lt;.0001</b> |
| site*season | <b>HV_Summer-LV_Summer</b> | -0.3346  | 0.0831 | 1139.0000 | -4.0260 | <b>0.0009000</b> |
|             | <b>HV_Summer-MV_Summer</b> | -0.2710  | 0.0836 | 1139.0000 | -3.2430 | <b>0.01540</b>   |
|             | LV_Summer-MV_Summer        | 0.0636   | 0.0836 | 1139.0000 | 0.7610  | 0.9739           |
|             | <b>HV_Winter-LV_Winter</b> | -0.3546  | 0.0794 | 1139.0000 | -4.4660 | <b>0.0001000</b> |
|             | <b>HV_Winter-MV_Winter</b> | -0.3557  | 0.0794 | 1139.0000 | -4.4800 | <b>0.0001000</b> |
|             | LV_Winter-MV_Winter        | -0.0011  | 0.0797 | 1139.0000 | -0.0140 | 1.000            |
|             | <b>HV_Summer-HV_Winter</b> | 0.8166   | 0.0811 | 1139.0000 | 10.0650 | <b>&lt;.0001</b> |
|             | <b>LV_Summer-LV_Winter</b> | 0.7966   | 0.0814 | 1139.0000 | 9.7840  | <b>&lt;.0001</b> |
|             | <b>MV_Summer-MV_Winter</b> | 0.7319   | 0.0819 | 1139.0000 | 8.9380  | <b>&lt;.0001</b> |

### C. Ofu Pools Mean Daily Temperatures

#### ANOVA

| Model: mean ~ site*seaso | Factor        | Df   | Sum Sq   | Mean Sq  | F value  | Pr(>F)           |
|--------------------------|---------------|------|----------|----------|----------|------------------|
|                          | site          | 2    | 0.3200   | 0.1580   | 0.2640   | 0.7681           |
|                          | <b>season</b> | 1    | 275.5600 | 275.5630 | 460.7104 | <b>&lt;.0001</b> |
|                          | site:season   | 2    | 1.0400   | 0.5210   | 0.8704   | 0.4191           |
|                          | Residuals     | 1139 | 681.2700 | 0.5980   |          |                  |

|        | Contrast             | Estimate | SE      | Df   | t-ratio | p-value          |
|--------|----------------------|----------|---------|------|---------|------------------|
| season | <b>Summer-Winter</b> | 0.9820   | 0.04577 | 1139 | 21.4560 | <b>&lt;.0001</b> |

---

---

**D. NOAA CRW DHW of Ofu Island from 2010-12 & 2015-16**

---

---

**ANOVA**

| Model: DHW ~ year | Factor      | Df | Sum Sq    | Mean Sq  | F value  | Pr(>F)            |
|-------------------|-------------|----|-----------|----------|----------|-------------------|
|                   | <b>year</b> | 17 | 4159.4000 | 244.6720 | 157.7300 | <b>&lt;0.0001</b> |

**Tukey's Test**

|      | Contrast           | Estimate | SE     | Df   | t-ratio  | p-value          |
|------|--------------------|----------|--------|------|----------|------------------|
| year | <b>2010 - 2011</b> | 0.5982   | 0.0922 | 6557 | 6.4890   | <b>&lt;.0001</b> |
|      | <b>2010 - 2012</b> | 0.5852   | 0.0921 | 6557 | 6.3520   | <b>&lt;.0001</b> |
|      | <b>2010 - 2015</b> | -1.3454  | 0.0922 | 6557 | -14.5930 | <b>&lt;.0001</b> |
|      | <b>2010 - 2016</b> | -0.6612  | 0.0921 | 6557 | -7.1770  | <b>&lt;.0001</b> |
|      | 2011 - 2012        | -0.0130  | 0.0921 | 6557 | -0.1410  | 1                |
|      | <b>2011 - 2015</b> | -1.9436  | 0.0922 | 6557 | -21.0820 | <b>&lt;.0001</b> |
|      | <b>2011 - 2016</b> | -1.2594  | 0.0921 | 6557 | -13.6700 | <b>&lt;.0001</b> |
|      | <b>2012 - 2015</b> | -1.9306  | 0.0921 | 6557 | -20.9550 | <b>&lt;.0001</b> |
|      | <b>2012 - 2016</b> | -1.2464  | 0.0921 | 6557 | -13.5380 | <b>&lt;.0001</b> |
|      | <b>2015 - 2016</b> | 0.6842   | 0.0921 | 6557 | 7.4270   | <b>&lt;.0001</b> |

---

---

---

---

**E. NOAA CRW SST of Ofu Island from 2010-12 & 2015-16**

---

---

**ANOVA**

Model: SST ~ year

|  | Factor      | Df | Sum Sq   | Mean Sq | F value | Pr(>F)            |
|--|-------------|----|----------|---------|---------|-------------------|
|  | <b>year</b> | 17 | 209.6000 | 12.3280 | 25.4690 | <b>&lt;0.0001</b> |

**Tukey's Test**

|      | Contrast           | Estimate | SE     | Df   | t-ratio | p-value          |
|------|--------------------|----------|--------|------|---------|------------------|
| year | <b>2010 - 2011</b> | 0.5198   | 0.0515 | 6557 | 10.0940 | <b>&lt;.0001</b> |
|      | <b>2010 - 2012</b> | 0.3170   | 0.0515 | 6557 | 6.1590  | <b>&lt;.0001</b> |
|      | <b>2010 - 2015</b> | 0.2721   | 0.0515 | 6557 | 5.2840  | <b>&lt;.0001</b> |
|      | 2010 - 2016        | 0.0099   | 0.0515 | 6557 | 0.1930  | 1.000            |

|                    |         |        |      |         |                  |
|--------------------|---------|--------|------|---------|------------------|
| <b>2011 - 2012</b> | -0.2029 | 0.0515 | 6557 | -3.9420 | <b>0.01010</b>   |
| <b>2011 - 2015</b> | -0.2477 | 0.0515 | 6557 | -4.8100 | <b>0.000200</b>  |
| <b>2011 - 2016</b> | -0.5099 | 0.0515 | 6557 | -9.9080 | <b>&lt;.0001</b> |
| 2012 - 2015        | -0.0448 | 0.0515 | 6557 | -0.8710 | 1.000            |
| <b>2012 - 2016</b> | -0.3070 | 0.0514 | 6557 | -5.9700 | <b>&lt;.0001</b> |
| <b>2015 - 2016</b> | -0.2622 | 0.0515 | 6557 | -5.0950 | <b>0.0001</b>    |

---

**F. NOAA CRW SST Anomalies of Ofu Island from 2010-12 & 2015-16**

---

**ANOVA**

Model: SSTA ~ year

| Factor      | Df | Sum Sq   | Mean Sq | F value | Pr(>F)           |
|-------------|----|----------|---------|---------|------------------|
| <b>year</b> | 17 | 210.1600 | 12.3623 | 94.5920 | <b>&lt;.0001</b> |

**Tukey's Test**

| Contrast                | Estimate | SE     | t-ratio  | p-value          |
|-------------------------|----------|--------|----------|------------------|
| year <b>2010 - 2011</b> | 0.5199   | 0.0268 | 19.4280  | <b>&lt;.0001</b> |
| <b>2010 - 2012</b>      | 0.3188   | 0.0267 | 11.9200  | <b>&lt;.0001</b> |
| <b>2010 - 2015</b>      | 0.2722   | 0.0268 | 10.1700  | <b>&lt;.0001</b> |
| 2010 - 2016             | 0.0118   | 0.0267 | 0.4400   | 1.000            |
| <b>2011 - 2012</b>      | -0.2011  | 0.0267 | -7.5210  | <b>&lt;.0001</b> |
| <b>2011 - 2015</b>      | -0.2477  | 0.0268 | -9.2570  | <b>&lt;.0001</b> |
| <b>2011 - 2016</b>      | -0.5081  | 0.0267 | -19.0010 | <b>&lt;.0001</b> |
| 2012 - 2015             | -0.0466  | 0.0267 | -1.7420  | 0.9584           |
| <b>2012 - 2016</b>      | -0.3070  | 0.0267 | -11.4880 | <b>&lt;.0001</b> |
| <b>2015 - 2016</b>      | -0.2604  | 0.0267 | -9.7380  | <b>&lt;.0001</b> |

---

**G. Ofu Pool Seasonal Temperature Summary**

| Site | Season                     | Water Temperature (°C) |       |         |       |         |       |       |       |        |
|------|----------------------------|------------------------|-------|---------|-------|---------|-------|-------|-------|--------|
|      |                            | Mean                   | SD    | Maximum | SD    | Minimum | SD    | DTR   | SD    | maxDTR |
| HV   | Winter 2015 (Oct-Apr)      | 28.119                 | 0.756 | 28.814  | 0.951 | 27.526  | 0.811 | 1.288 | 0.720 | 4.045  |
|      | Summer 2015-16 (Apr - Oct) | 29.185                 | 0.627 | 30.645  | 0.901 | 28.343  | 0.683 | 2.302 | 0.822 | 6.484  |
|      | Annual                     | 28.626                 | 0.941 | 29.684  | 1.506 | 27.914  | 0.914 | 1.770 | 1.188 |        |
| MV   | Winter 2015 (Oct-Apr)      | 28.023                 | 0.717 | 28.572  | 0.827 | 27.695  | 0.726 | 0.877 | 0.508 | 3.307  |
|      | Summer 2015-16 (Apr - Oct) | 29.155                 | 0.781 | 30.127  | 1.082 | 28.614  | 0.800 | 1.513 | 0.920 | 4.572  |
|      | Annual                     | 28.656                 | 0.901 | 29.398  | 1.195 | 28.229  | 0.862 | 1.169 | 0.817 |        |
| LV   | Winter 2015 (Oct-Apr)      | 28.218                 | 0.765 | 28.799  | 0.852 | 27.881  | 0.849 | 0.919 | 0.421 | 3.335  |
|      | Summer 2015-16 (Apr - Oct) | 29.149                 | 0.789 | 30.052  | 1.172 | 28.678  | 0.785 | 1.374 | 0.954 | 5.714  |
|      | Annual                     | 28.664                 | 0.905 | 29.399  | 1.194 | 28.263  | 0.877 | 1.137 | 0.761 |        |

Table S5 *Porites lobata* physiology

WEEKLY GROWTH RATE

A. Growth (g) over Time ((final-initial) / weeks)

Shapiro-wilk

| growth ~ time+origin+dest | time   | origin    | dest      | p-value        |
|---------------------------|--------|-----------|-----------|----------------|
|                           | Jan-16 | HV        | HV        | 0.05005        |
|                           |        | MV        | HV        | 0.05031        |
|                           |        | LV        | HV        | 0.3070         |
|                           |        | MV        | MV        | 0.1381         |
|                           |        | LV        | LV        | 0.8672         |
|                           | Jul-16 | HV        | HV        | 0.4296         |
|                           |        | <b>MV</b> | <b>HV</b> | <b>0.01741</b> |
|                           |        | LV        | HV        | 0.3606         |
|                           |        | MV        | MV        | 0.8815         |
|                           |        | LV        | LV        | 0.5801         |

Bartlett HOV

| growth ~ time+origin_dest | time   | K-squared | df | p-value |
|---------------------------|--------|-----------|----|---------|
|                           | Jan-16 | 1.8024    | 4  | 0.7720  |
|                           | Jul-16 | 6.6295    | 4  | 0.1568  |

Summary

| time   | origin_dest | mean   | sd     | min    | Q1     | median | Q3     | max    | n |
|--------|-------------|--------|--------|--------|--------|--------|--------|--------|---|
| Jan-16 | HV_HV       | 0.1650 | 0.0600 | 0.0950 | 0.1050 | 0.2000 | 0.2100 | 0.2150 | 5 |
|        | MV_HV       | 0.0680 | 0.0290 | 0.0400 | 0.0500 | 0.0500 | 0.1000 | 0.1000 | 5 |
|        | MV_MV       | 0.0830 | 0.0500 | 0.0200 | 0.0400 | 0.1050 | 0.1250 | 0.1250 | 5 |
|        | LV_HV       | 0.0880 | 0.0540 | 0.0400 | 0.0440 | 0.0800 | 0.1240 | 0.1500 | 4 |
|        | LV_LV       | 0.1060 | 0.0540 | 0.0250 | 0.0850 | 0.1200 | 0.1300 | 0.1700 | 5 |
| Jul-16 | HV_HV       | 0.2720 | 0.1350 | 0.1300 | 0.1400 | 0.2950 | 0.3600 | 0.4350 | 5 |
|        | MV_HV       | 0.1250 | 0.0470 | 0.0550 | 0.1220 | 0.1450 | 0.1480 | 0.1550 | 4 |
|        | MV_MV       | 0.2490 | 0.0490 | 0.1950 | 0.2180 | 0.2480 | 0.2790 | 0.3050 | 4 |
|        | LV_HV       | 0.0700 | 0.0540 | 0.0200 | 0.0280 | 0.0650 | 0.1080 | 0.1300 | 4 |
|        | LV_LV       | 0.1770 | 0.0510 | 0.1200 | 0.1400 | 0.1650 | 0.2200 | 0.2400 | 5 |

---

---

**ANOVA**

---

Model: grate ~ time\*origin\_dest + Error(colony)

|                     | Factor           | Df | Sum Sq | Mean Sq | F value | Pr(>F)           |
|---------------------|------------------|----|--------|---------|---------|------------------|
| Error: Between time |                  | 1  | 0.0234 | 0.0234  | 2.217   | 0.1670           |
|                     | origin_dest      | 3  | 0.0733 | 0.0244  | 2.31    | 0.1380           |
|                     | residuals        | 10 | 0.1057 | 0.0106  |         |                  |
| Error: Within time  |                  | 1  | 0.0604 | 0.0604  | 33.75   | < 0.0001         |
|                     | origin_dest      | 2  | 0.0359 | 0.0180  | 10.04   | <b>0.0006780</b> |
|                     | time:origin_dest | 4  | 0.0356 | 0.0089  | 4.97    | <b>0.004596</b>  |
|                     | residuals        | 24 | 0.0430 | 0.0018  |         |                  |

---

**Tukey's Test**

---

|                  | Contrast                    | Estimate | Std. Error | z value | Pr(> z )       |
|------------------|-----------------------------|----------|------------|---------|----------------|
| origin_dest      | <b>MV_HV - HV_HV</b>        | -0.1291  | 0.0422     | -3.0580 | <b>0.02230</b> |
|                  | <b>LV_HV - HV_HV</b>        | -0.1415  | 0.0435     | -3.2500 | <b>0.01150</b> |
|                  | MV_MV - HV_HV               | -0.0658  | 0.0422     | -1.5580 | 1.000          |
|                  | LV_LV - HV_HV               | -0.0770  | 0.0414     | -1.8580 | 0.6314         |
|                  | LV_HV - MV_HV               | -0.0123  | 0.0443     | -0.2780 | 1.000          |
|                  | MV_MV - MV_HV               | 0.0633   | 0.0334     | 1.8960  | 0.5801         |
|                  | LV_LV - MV_HV               | 0.0521   | 0.0422     | 1.2350  | 1.000          |
|                  | MV_MV - LV_HV               | 0.0757   | 0.0443     | 1.7090  | 0.8748         |
|                  | LV_LV - LV_HV               | 0.0645   | 0.0344     | 1.8750  | 0.6083         |
|                  | LV_LV - MV_MV               | -0.0112  | 0.0422     | -0.2650 | 1.000          |
| time*origin_dest |                             |          |            |         |                |
| Jan-16           | Jan-16.MV_HV - Jan-16.HV_HV | -0.0970  | 0.0438     | -2.2170 | 1.000          |
|                  | Jan-16.LV_HV - Jan-16.HV_HV | -0.0807  | 0.0452     | -1.7850 | 1.000          |
|                  | Jan-16.MV_MV - Jan-16.HV_HV | -0.0820  | 0.0438     | -1.8740 | 1.000          |
|                  | Jan-16.LV_LV - Jan-16.HV_HV | -0.0590  | 0.0438     | -1.3480 | 1.000          |
|                  | Jan-16.LV_HV-Jan-16.MV_HV   | 0.0163   | 0.0452     | 0.3620  | 1.000          |
|                  | Jan-16.MV_MV-Jan-16.MV_HV   | 0.0150   | 0.0270     | 0.5550  | 1.000          |



|                   |                                  |         |        |         |                    |
|-------------------|----------------------------------|---------|--------|---------|--------------------|
|                   | Jan-16.LV_LV-Jan-16.MV_HV        | 0.0380  | 0.0438 | 0.8680  | 1.000              |
|                   | Jan-16.MV_MV-Jan-16.LV_HV        | -0.0013 | 0.0452 | -0.0300 | 1.000              |
|                   | Jan-16.LV_LV-Jan-16.LV_HV        | 0.0217  | 0.0293 | 0.7400  | 1.000              |
|                   | Jan-16.LV_LV-Jan-16.MV_MV        | 0.0230  | 0.0438 | 0.5260  | 1.000              |
| Jul-16            | <b>Jul-16.MV_HV-Jul-16.HV_HV</b> | -0.1547 | 0.0452 | -3.4250 | <b>0.02769</b>     |
|                   | <b>Jul-16.LV_HV-Jul-16.HV_HV</b> | -0.2052 | 0.0452 | -4.5410 | <b>0.0002520</b>   |
|                   | Jul-16.MV_MV-Jul-16.HV_HV        | -0.0310 | 0.0452 | -0.6860 | 1.000              |
|                   | Jul-16.LV_LV-Jul-16.HV_HV        | -0.0950 | 0.0438 | -2.1710 | 1.000              |
|                   | Jul-16.LV_HV-Jul-16.MV_HV        | -0.0504 | 0.0466 | -1.0830 | 1.000              |
|                   | <b>Jul-16.MV_MV-Jul-16.MV_HV</b> | 0.1238  | 0.0302 | 4.0950  | <b>0.001904</b>    |
|                   | <b>Jul-16.MV_MV-Jul-16.LV_HV</b> | 0.1742  | 0.0466 | 3.7410  | <b>0.008253</b>    |
|                   | <b>Jul-16.LV_LV-Jul-16.LV_HV</b> | 0.1102  | 0.0293 | 3.7630  | <b>0.007564</b>    |
|                   | Jul-16.LV_LV-Jul-16.MV_MV        | -0.0640 | 0.0452 | -1.4170 | 1.000              |
| Jan-16 vs. Jul-16 | <b>Jul-16.HV_HV-Jan-16.HV_HV</b> | 0.1070  | 0.0270 | 3.9580  | <b>0.003399</b>    |
|                   | Jul-16.MV_HV-Jan-16.MV_HV        | 0.0493  | 0.0293 | 1.6830  | 1.000              |
|                   | Jul-16.LV_HV-Jan-16.LV_HV        | -0.0175 | 0.0302 | -0.5790 | 1.000              |
|                   | <b>Jul-16.MV_MV-Jan-16.MV_MV</b> | 0.1580  | 0.0293 | 5.3980  | <b>&lt; 0.0001</b> |
|                   | Jul-16.LV_LV-Jan-16.LV_LV        | 0.0710  | 0.0270 | 2.6260  | 0.3883             |

Fv/Fm

**B. Normalized Fv/Fm following heat stress ((0hr-21hr)/0hr)**

**Shapiro-wilk**

| Model: Fvfm ~ time+orig | time   | origin    | dest      | trt         | p-value        |
|-------------------------|--------|-----------|-----------|-------------|----------------|
|                         | Jan-16 | HV        | HV        | heat        | 0.4211         |
|                         |        | HV        | HV        | cont        | 0.1014         |
|                         |        | MV        | HV        | heat        | 0.3078         |
|                         |        | MV        | HV        | cont        | 0.5283         |
|                         |        | MV        | MV        | heat        | 0.9036         |
|                         |        | MV        | MV        | cont        | 0.4504         |
|                         |        | LV        | HV        | heat        | 0.4676         |
|                         |        | LV        | HV        | cont        | 0.5751         |
|                         |        | LV        | LV        | heat        | 0.7559         |
|                         |        | LV        | LV        | cont        | 0.0651         |
|                         | Jul-16 | HV        | HV        | heat        | 0.2175         |
|                         |        | HV        | HV        | cont        | 0.4771         |
|                         |        | <b>MV</b> | <b>HV</b> | <b>heat</b> | <b>0.01827</b> |
|                         |        | MV        | HV        | cont        | 0.9470         |
|                         |        | MV        | MV        | heat        | 0.4734         |
|                         |        | MV        | MV        | cont        | 0.1270         |
|                         |        | LV        | HV        | heat        | 0.6272         |
|                         |        | LV        | HV        | cont        | 0.3074         |
|                         |        | LV        | LV        | heat        | 0.7562         |
|                         |        | LV        | LV        | cont        | 0.7022         |

**Bartlett HOV**

| Model: Fvfm ~ time+orig | time          | K-squared | df | p-value         |
|-------------------------|---------------|-----------|----|-----------------|
|                         | <b>Jan-16</b> | 14.8220   | 4  | <b>0.005085</b> |
|                         | Jul-16        | 8.4805    | 4  | 0.07548         |

**Summary**

| time | origin_dest.trt | mean | sd | min | Q1 | median | Q3 | max | n |
|------|-----------------|------|----|-----|----|--------|----|-----|---|
|------|-----------------|------|----|-----|----|--------|----|-----|---|

|                   |        |        |        |        |        |        |        |   |
|-------------------|--------|--------|--------|--------|--------|--------|--------|---|
| Jan-16 HV_HV.cont | 0.8800 | 0.0200 | 0.8620 | 0.8670 | 0.8680 | 0.8990 | 0.9050 | 5 |
| HV_HV.heat        | 0.5630 | 0.0690 | 0.4530 | 0.5440 | 0.5820 | 0.6100 | 0.6260 | 5 |
| MV_HV.cont        | 0.8870 | 0.0580 | 0.7990 | 0.8620 | 0.9100 | 0.9210 | 0.9440 | 5 |
| MV_HV.heat        | 0.7880 | 0.0240 | 0.7590 | 0.7670 | 0.7940 | 0.8080 | 0.8110 | 5 |
| LV_HV.cont        | 0.8700 | 0.0340 | 0.8390 | 0.8500 | 0.8620 | 0.8830 | 0.9180 | 4 |
| LV_HV.heat        | 0.6640 | 0.1640 | 0.4880 | 0.5440 | 0.6680 | 0.7870 | 0.8320 | 4 |
| MV_MV.cont        | 0.8940 | 0.0500 | 0.8240 | 0.8590 | 0.9150 | 0.9270 | 0.9430 | 5 |
| MV_MV.heat        | 0.8110 | 0.0610 | 0.7320 | 0.7810 | 0.8220 | 0.8250 | 0.8960 | 5 |
| LV_LV.cont        | 0.8650 | 0.0290 | 0.8150 | 0.8710 | 0.8720 | 0.8750 | 0.8910 | 5 |
| LV_LV.heat        | 0.5510 | 0.1300 | 0.3800 | 0.4590 | 0.5960 | 0.6140 | 0.7050 | 5 |
| Jul-16 HV_HV.cont | 0.9690 | 0.0360 | 0.9100 | 0.9610 | 0.9800 | 0.9880 | 1.0050 | 5 |
| HV_HV.heat        | 0.4330 | 0.1900 | 0.1230 | 0.3980 | 0.4750 | 0.5820 | 0.5860 | 5 |
| MV_HV.cont        | 0.9510 | 0.0190 | 0.9310 | 0.9400 | 0.9500 | 0.9610 | 0.9740 | 4 |
| MV_HV.heat        | 0.6600 | 0.1190 | 0.4830 | 0.6490 | 0.7120 | 0.7240 | 0.7320 | 4 |
| LV_HV.cont        | 0.9360 | 0.0370 | 0.8930 | 0.9220 | 0.9510 | 0.9570 | 0.9630 | 3 |
| LV_HV.heat        | 0.5470 | 0.1860 | 0.3440 | 0.4660 | 0.5890 | 0.6490 | 0.7090 | 3 |
| MV_MV.cont        | 0.9420 | 0.0200 | 0.9230 | 0.9350 | 0.9350 | 0.9400 | 0.9750 | 5 |
| MV_MV.heat        | 0.7720 | 0.1200 | 0.5910 | 0.7310 | 0.7790 | 0.8770 | 0.8840 | 5 |
| LV_LV.cont        | 0.9390 | 0.0190 | 0.9190 | 0.9260 | 0.9380 | 0.9520 | 0.9610 | 4 |
| LV_LV.heat        | 0.6790 | 0.1310 | 0.5440 | 0.5880 | 0.6680 | 0.7600 | 0.8360 | 4 |

## ANOVA

Model: Fvfmnorm ~ time\*origin\_dest\*trt + Error(colony)

|                  | Factor             | Df | Sum Sq | Mean Sq | F value  | Pr(>F)             |
|------------------|--------------------|----|--------|---------|----------|--------------------|
| Between Subjects | time               | 1  | 0.0271 | 0.0271  | 1.7770   | 0.2193             |
|                  | <b>origin_dest</b> | 4  | 0.3094 | 0.0774  | 5.0660   | <b>0.02480</b>     |
|                  | time:origin_dest   | 1  | 0.0103 | 0.0103  | 0.6740   | 0.4355             |
|                  | Residuals          | 8  | 0.1222 | 0.0153  |          |                    |
| Within Subjects  | time               | 1  | 0.0001 | 0.0001  | 0.0140   | 0.9053             |
|                  | origin_dest        | 2  | 0.0205 | 0.0102  | 1.5330   | 0.2245             |
|                  | <b>trt</b>         | 1  | 1.5442 | 1.5442  | 231.0940 | <b>&lt; 0.0001</b> |

|                        |    |        |        |         |                    |
|------------------------|----|--------|--------|---------|--------------------|
| time:origin_dest       | 4  | 0.0329 | 0.0082 | 1.2290  | 0.3085             |
| <b>time:trt</b>        | 1  | 0.0869 | 0.0869 | 13.0100 | <b>0.0006460</b>   |
| <b>origin_dest:trt</b> | 4  | 0.2591 | 0.0648 | 9.6950  | <b>&lt; 0.0001</b> |
| time:origin_dest:trt   | 4  | 0.0560 | 0.0140 | 2.0960  | 0.09293            |
| Residuals              | 58 | 0.3876 | 0.0067 |         |                    |

**Tukey's Test (Bonferroni corrected)**

|                 | Contrast                       | Estimate | Std. Error | z value | Pr(> z )           |
|-----------------|--------------------------------|----------|------------|---------|--------------------|
| origin_dest     | MV_HV - HV_HV                  | -0.1121  | 0.0568     | -1.9750 | 0.4820             |
|                 | LV_HV - HV_HV                  | -0.0449  | 0.0609     | -0.7380 | 1.000              |
|                 | LV_HV - MV_HV                  | 0.0672   | 0.0623     | 1.0790  | 1.000              |
|                 | MV_MV - HV_HV                  | -0.1435  | 0.0553     | -2.5970 | 0.09400            |
|                 | LV_LV - HV_HV                  | -0.0416  | 0.0568     | -0.7330 | 1.000              |
|                 | MV_MV - MV_HV                  | -0.0314  | 0.0568     | -0.5530 | 1.000              |
|                 | LV_LV - LV_HV                  | 0.0033   | 0.0623     | 0.0530  | 1.000              |
|                 | LV_LV - MV_HV                  | 0.0705   | 0.0582     | 1.2100  | 1.000              |
|                 | MV_MV - LV_HV                  | -0.0986  | 0.0609     | -1.6190 | 1.000              |
|                 | LV_LV - MV_MV                  | 0.1019   | 0.0568     | 1.7940  | 0.7270             |
| origin_dest*trt | <b>HV_HV.heat - HV_HV.cont</b> | 0.4266   | 0.0410     | 10.4160 | <b>&lt; 0.0001</b> |
|                 | <b>MV_HV.heat - MV_HV.cont</b> | 0.1847   | 0.0432     | 4.2780  | <b>0.0008500</b>   |
|                 | <b>LV_HV.heat - LV_HV.cont</b> | 0.2846   | 0.0490     | 5.8140  | <b>&lt; 0.0001</b> |
|                 | MV_MV.heat - MV_MV.cont        | 0.1258   | 0.0410     | 3.0720  | 0.09578            |
|                 | <b>LV_LV.heat - LV_LV.cont</b> | 0.2901   | 0.0432     | 6.7200  | <b>&lt; 0.0001</b> |
|                 | <b>MV_HV.heat - HV_HV.heat</b> | -0.2327  | 0.0502     | -4.6330 | <b>0.0001620</b>   |
|                 | MV_HV.cont - HV_HV.cont        | 0.0092   | 0.0502     | 0.1840  | 1.000              |
|                 | LV_HV.heat - HV_HV.heat        | -0.1265  | 0.0533     | -2.3730 | 0.7950             |
|                 | LV_HV.cont - HV_HV.cont        | 0.0155   | 0.0533     | 0.2910  | 1.000              |
|                 | LV_HV.heat - MV_HV.heat        | 0.1062   | 0.0543     | 1.9560  | 1.000              |
|                 | LV_HV.cont - MV_HV.cont        | 0.0063   | 0.0543     | 0.1160  | 1.000              |
|                 | <b>MV_MV.heat - HV_HV.heat</b> | -0.2939  | 0.0492     | -5.9720 | <b>&lt; 0.0001</b> |

|                                |         |        |         |                 |
|--------------------------------|---------|--------|---------|-----------------|
| MV_MV.cont - HV_HV.cont        | 0.0069  | 0.0492 | 0.1400  | 1.000           |
| LV_LV.heat - HV_HV.heat        | -0.1029 | 0.0502 | -2.0480 | 1.000           |
| LV_LV.cont - HV_HV.cont        | 0.0336  | 0.0502 | 0.6690  | 1.000           |
| MV_MV.heat - MV_HV.heat        | -0.0612 | 0.0422 | -1.4510 | 1.000           |
| MV_MV.cont - MV_HV.cont        | -0.0023 | 0.0422 | -0.0550 | 1.000           |
| LV_LV.heat - LV_HV.heat        | 0.0237  | 0.0471 | 0.5020  | 1.000           |
| LV_LV.cont - LV_HV.cont        | 0.0181  | 0.0471 | 0.3850  | 1.000           |
| LV_LV.heat - MV_HV.heat        | 0.1299  | 0.0512 | 2.5350  | 0.5062          |
| LV_LV.cont - MV_HV.cont        | 0.0244  | 0.0512 | 0.4760  | 1.000           |
| MV_MV.heat - LV_HV.heat        | -0.1674 | 0.0533 | -3.1380 | 0.07650         |
| MV_MV.cont - LV_HV.cont        | -0.0086 | 0.0533 | -0.1610 | 1.000           |
| <b>LV_LV.heat - MV_MV.heat</b> | 0.1910  | 0.0502 | 3.8030  | <b>0.006428</b> |
| LV_LV.cont - MV_MV.cont        | 0.0267  | 0.0502 | 0.5320  | 1.000           |

|                                           |         |        |         |                    |
|-------------------------------------------|---------|--------|---------|--------------------|
| time*trt <b>Jan-16.heat - Jan-16.cont</b> | 0.2038  | 0.0296 | 6.8800  | <b>&lt; 0.0001</b> |
| <b>Jul-16.heat - Jul-16.cont</b>          | 0.3284  | 0.0317 | 10.3690 | <b>&lt; 0.0001</b> |
| Jan-16.heat - Jul-16.heat                 | -0.0591 | 0.0308 | -1.9220 | 0.3280             |
| Jan-16.cont - Jul-16.cont                 | 0.0655  | 0.0308 | 2.1280  | 0.2000             |

time\*origin\_dest\*trt

|                                                     |         |        |         |                    |
|-----------------------------------------------------|---------|--------|---------|--------------------|
| Jan-16 <b>Jan-16.HV_HV.heat - Jan-16.HV_HV.cont</b> | 0.3172  | 0.0521 | 6.0860  | <b>&lt; 0.0001</b> |
| Jan-16.MV_HV.heat - Jan-16.MV_HV.cont               | 0.0994  | 0.0521 | 1.9070  | 1.000              |
| <b>Jan-16.LV_HV.heat - Jan-16.LV_HV.cont</b>        | 0.2068  | 0.0583 | 3.5480  | <b>0.07367</b>     |
| Jan-16.MV_MV.heat - Jan-16.MV_MV.cont               | 0.0824  | 0.0521 | 1.5810  | 1.000              |
| <b>Jan-16.LV_LV.heat - Jan-16.LV_LV.cont</b>        | 0.3140  | 0.0521 | 6.0250  | <b>&lt; 0.0001</b> |
| <b>Jan-16.MV_HV.heat - Jan-16.HV_HV.heat</b>        | -0.2248 | 0.0590 | -3.8130 | <b>0.02612</b>     |
| Jan-16.LV_HV.heat - Jan-16.HV_HV.heat               | -0.1106 | 0.0621 | -1.7800 | 1.000              |
| <b>Jan-16.MV_MV.heat - Jan-16.HV_HV.heat</b>        | -0.2482 | 0.0590 | -4.2100 | <b>0.004862</b>    |
| Jan-16.LV_LV.heat - Jan-16.HV_HV.heat               | 0.0122  | 0.0590 | 0.2070  | 1.000              |
| Jan-16.MV_MV.heat - Jan-16.MV_HV.heat               | -0.0234 | 0.0521 | -0.4490 | 1.000              |
| Jan-16.LV_HV.heat - Jan-16.MV_HV.heat               | 0.1142  | 0.0621 | 1.8380  | 1.000              |

|        |                                              |         |        |         |                    |
|--------|----------------------------------------------|---------|--------|---------|--------------------|
|        | <b>Jan-16.LV_LV.heat - Jan-16.MV_HV.heat</b> | 0.2370  | 0.0590 | 4.0200  | <b>0.01108</b>     |
|        | Jan-16.LV_LV.heat - Jan-16.LV_HV.heat        | 0.1228  | 0.0557 | 2.2050  | 1.000              |
|        | Jan-16.MV_MV.heat - Jan-16.LV_HV.heat        | -0.1376 | 0.0621 | -2.2140 | 1.000              |
|        | <b>Jan-16.LV_LV.heat - Jan-16.MV_MV.heat</b> | 0.2604  | 0.0590 | 4.4160  | <b>0.001906</b>    |
|        | Jan-16.MV_HV.cont - Jan-16.HV_HV.cont        | -0.0070 | 0.0590 | -0.1190 | 1.000              |
|        | Jan-16.LV_HV.cont - Jan-16.HV_HV.cont        | -0.0002 | 0.0621 | -0.0020 | 1.000              |
|        | Jan-16.MV_MV.cont - Jan-16.HV_HV.cont        | -0.0134 | 0.0590 | -0.2270 | 1.000              |
|        | Jan-16.LV_LV.cont - Jan-16.HV_HV.cont        | 0.0154  | 0.0590 | 0.2610  | 1.000              |
|        | Jan-16.MV_MV.cont - Jan-16.MV_HV.cont        | -0.0064 | 0.0521 | -0.1230 | 1.000              |
|        | Jan-16.LV_HV.cont - Jan-16.MV_HV.cont        | 0.0068  | 0.0621 | 0.1100  | 1.000              |
|        | Jan-16.LV_LV.cont - Jan-16.MV_HV.cont        | 0.0224  | 0.0590 | 0.3800  | 1.000              |
|        | Jan-16.MV_MV.cont - Jan-16.LV_HV.cont        | -0.0132 | 0.0621 | -0.2130 | 1.000              |
|        | Jan-16.LV_LV.cont - Jan-16.LV_HV.cont        | 0.0156  | 0.0557 | 0.2790  | 1.000              |
|        | Jan-16.LV_LV.cont - Jan-16.MV_MV.cont        | 0.0288  | 0.0590 | 0.4880  | 1.000              |
| Jul-16 | <b>Jul-16.HV_HV.heat - Jul-16.HV_HV.cont</b> | 0.5360  | 0.0521 | 10.2850 | <b>&lt; 0.0001</b> |
|        | <b>Jul-16.MV_HV.heat - Jul-16.MV_HV.cont</b> | 0.2913  | 0.0583 | 4.9980  | <b>0.0001100</b>   |
|        | <b>Jul-16.LV_HV.heat - Jul-16.LV_HV.cont</b> | 0.3883  | 0.0673 | 5.7720  | <b>&lt; 0.0001</b> |
|        | Jul-16.MV_MV.heat - Jul-16.MV_MV.cont        | 0.1692  | 0.0521 | 3.2470  | 0.2219             |
|        | <b>Jul-16.LV_LV.heat - Jul-16.LV_LV.cont</b> | 0.2603  | 0.0583 | 4.4660  | <b>0.001511</b>    |
|        | Jul-16.MV_HV.heat - Jul-16.HV_HV.heat        | -0.2255 | 0.0621 | -3.6330 | 0.05317            |
|        | Jul-16.LV_HV.heat - Jul-16.HV_HV.heat        | -0.1259 | 0.0670 | -1.8790 | 1.000              |
|        | <b>Jul-16.MV_MV.heat - Jul-16.HV_HV.heat</b> | -0.3396 | 0.0590 | -5.7600 | <b>&lt; 0.0001</b> |
|        | <b>Jul-16.LV_LV.heat - Jul-16.HV_HV.heat</b> | -0.2310 | 0.0621 | -3.7220 | <b>0.03759</b>     |
|        | Jul-16.MV_MV.heat - Jul-16.MV_HV.heat        | -0.1141 | 0.0556 | -2.0530 | 1.000              |
|        | Jul-16.LV_HV.heat - Jul-16.MV_HV.heat        | 0.0996  | 0.0698 | 1.4270  | 1.000              |
|        | Jul-16.LV_LV.heat - Jul-16.MV_HV.heat        | -0.0056 | 0.0650 | -0.0860 | 1.000              |
|        | Jul-16.LV_LV.heat - Jul-16.LV_HV.heat        | -0.1051 | 0.0646 | -1.6280 | 1.000              |
|        | Jul-16.MV_MV.heat - Jul-16.LV_HV.heat        | -0.2137 | 0.0670 | -3.1890 | 0.2715             |
|        | Jul-16.LV_LV.heat - Jul-16.MV_MV.heat        | 0.1086  | 0.0621 | 1.7490  | 1.000              |
|        | Jul-16.MV_HV.cont - Jul-16.HV_HV.cont        | 0.0193  | 0.0621 | 0.3100  | 1.000              |
|        | Jul-16.LV_HV.cont - Jul-16.HV_HV.cont        | 0.0218  | 0.0670 | 0.3250  | 1.000              |

|                   |                                       |         |        |         |       |
|-------------------|---------------------------------------|---------|--------|---------|-------|
|                   | Jul-16.MV_MV.cont - Jul-16.HV_HV.cont | 0.0272  | 0.0590 | 0.4610  | 1.000 |
|                   | Jul-16.LV_LV.cont - Jul-16.HV_HV.cont | 0.0447  | 0.0621 | 0.7200  | 1.000 |
|                   | Jul-16.MV_MV.cont - Jul-16.MV_HV.cont | 0.0079  | 0.0556 | 0.1430  | 1.000 |
|                   | Jul-16.LV_HV.cont - Jul-16.MV_HV.cont | 0.0025  | 0.0698 | 0.0360  | 1.000 |
|                   | Jul-16.LV_LV.cont - Jul-16.MV_HV.cont | 0.0254  | 0.0650 | 0.3910  | 1.000 |
|                   | Jul-16.MV_MV.cont - Jul-16.LV_HV.cont | 0.0054  | 0.0670 | 0.0810  | 1.000 |
|                   | Jul-16.LV_LV.cont - Jul-16.LV_HV.cont | 0.0230  | 0.0646 | 0.3550  | 1.000 |
|                   | Jul-16.LV_LV.cont - Jul-16.MV_MV.cont | 0.0175  | 0.0621 | 0.2820  | 1.000 |
| Jan-16 vs. Jul-16 | Jan-16.HV_HV.cont - Jul-16.HV_HV.cont | 0.0886  | 0.0521 | 1.7000  | 1.000 |
|                   | Jan-16.HV_HV.heat - Jul-16.HV_HV.heat | -0.1302 | 0.0521 | -2.4980 | 1.000 |
|                   | Jan-16.LV_HV.cont - Jul-16.LV_HV.cont | 0.0667  | 0.0634 | 1.0520  | 1.000 |
|                   | Jan-16.LV_HV.heat - Jul-16.LV_HV.heat | -0.1149 | 0.0634 | -1.8120 | 1.000 |
|                   | Jan-16.LV_LV.cont - Jul-16.LV_LV.cont | 0.0593  | 0.0556 | 1.0660  | 1.000 |
|                   | Jan-16.LV_LV.heat - Jul-16.LV_LV.heat | 0.1130  | 0.0556 | 2.0320  | 1.000 |
|                   | Jan-16.MV_HV.cont - Jul-16.MV_HV.cont | 0.0623  | 0.0556 | 1.1210  | 1.000 |
|                   | Jan-16.MV_HV.heat - Jul-16.MV_HV.heat | -0.1295 | 0.0556 | -2.3300 | 1.000 |
|                   | Jan-16.MV_MV.cont - Jul-16.MV_MV.cont | 0.0480  | 0.0521 | 0.9210  | 1.000 |
|                   | Jan-16.MV_MV.heat - Jul-16.MV_MV.heat | -0.0388 | 0.0521 | -0.7440 | 1.000 |

CHL

C. Total Chlorophyll Retention (1-(control-heat)/control)

Shapiro-wilk

| Model: chlratio ~ time+ori | time   | origin | dest | p-value        |
|----------------------------|--------|--------|------|----------------|
|                            | Jan-16 | HV     | HV   | <b>0.02362</b> |
|                            |        | MV     | HV   | 0.3643         |
|                            |        | MV     | MV   | 0.8767         |
|                            |        | LV     | HV   | 0.1460         |
|                            |        | LV     | LV   | 0.3353         |
|                            | Jul-16 | HV     | HV   | 0.3350         |
|                            |        | MV     | HV   | 0.8908         |
|                            |        | MV     | MV   | 0.4590         |
|                            |        | LV     | HV   | 0.7497         |
|                            |        | LV     | LV   | 0.3829         |

Bartlett HOV

| Model: chlratio ~ time+ori | time          | K-squared | df | p-value        |
|----------------------------|---------------|-----------|----|----------------|
|                            | Jan-16        | 2.5123    | 4  | 0.6424         |
|                            | <b>Jul-16</b> | 10.4210   | 4  | <b>0.03391</b> |

Summary

| time   | origin_dest | mean   | sd     | min    | Q1     | median | Q3     | max    | n |
|--------|-------------|--------|--------|--------|--------|--------|--------|--------|---|
| Jan-16 | HV_HV       | 0.2360 | 0.1670 | 0.1190 | 0.1480 | 0.1750 | 0.2100 | 0.5290 | 5 |
|        | MV_HV       | 0.7570 | 0.3240 | 0.2560 | 0.6180 | 0.9140 | 0.9360 | 1.0600 | 5 |
|        | MV_MV       | 0.6380 | 0.2770 | 0.3070 | 0.5190 | 0.5570 | 0.7680 | 1.0370 | 5 |
|        | LV_HV       | 0.4700 | 0.3160 | 0.2350 | 0.2880 | 0.3570 | 0.5390 | 0.9330 | 4 |
|        | LV_LV       | 0.4310 | 0.1800 | 0.2250 | 0.3000 | 0.3960 | 0.6110 | 0.6220 | 5 |
| Jul-16 | HV_HV       | 0.3170 | 0.3150 | 0.0430 | 0.0870 | 0.2380 | 0.3940 | 0.8240 | 5 |
|        | MV_HV       | 0.5890 | 0.1470 | 0.4310 | 0.4940 | 0.5790 | 0.6740 | 0.7670 | 4 |
|        | MV_MV       | 0.6030 | 0.2630 | 0.2830 | 0.4200 | 0.5760 | 0.8560 | 0.8800 | 5 |
|        | LV_HV       | 0.6560 | 0.5230 | 0.1770 | 0.3770 | 0.5770 | 0.8950 | 1.2130 | 3 |
|        | LV_LV       | 0.7270 | 0.0490 | 0.6740 | 0.6920 | 0.7300 | 0.7660 | 0.7750 | 4 |



---

---

**ANOVA**

Model: chlratio ~ time\*origin\*dest + Error(colony)

|                     | Factor      | Df | Sum Sq | Mean Sq | F value | Pr(>F)  |
|---------------------|-------------|----|--------|---------|---------|---------|
| Error: Between time |             | 1  | 0.0014 | 0.0014  | 0.0100  | 0.9232  |
|                     | origin      | 2  | 0.9778 | 0.4889  | 3.4930  | 0.08120 |
|                     | dest        | 2  | 0.1895 | 0.0947  | 0.6770  | 0.5351  |
|                     | time:dest   | 1  | 0.2877 | 0.2877  | 2.0550  | 0.1896  |
|                     | Residuals   | 8  | 1.1199 | 0.1400  |         |         |
| Error: Within time  |             | 1  | 0.0335 | 0.0335  | 0.8540  | 0.3650  |
|                     | dest        | 2  | 0.0464 | 0.0232  | 0.5920  | 0.5610  |
|                     | time:origin | 2  | 0.2499 | 0.1250  | 3.1860  | 0.06000 |
|                     | time:dest   | 2  | 0.0318 | 0.0159  | 0.4050  | 0.6720  |
|                     | Residuals   | 23 | 0.9020 | 0.0392  |         |         |

---

**Tukey's Test (Bonferroni corrected)**

|             | Contrast                     | Estimate | Std. Error | z value | Pr(> z )        |
|-------------|------------------------------|----------|------------|---------|-----------------|
|             | origin MV - HV               | 1.7321   | 0.8984     | 1.9280  | 0.1616          |
|             | <b>LV - HV</b>               | 2.9576   | 0.9072     | 3.2600  | <b>0.003340</b> |
|             | LV - MV                      | 1.2254   | 0.8737     | 1.4030  | 0.4822          |
| time*origin | <b>Jan-16.MV - Jan-16.HV</b> | 0.4609   | 0.1562     | 2.9510  | <b>0.04760</b>  |
|             | Jan-16.LV - Jan-16.HV        | 0.2171   | 0.1578     | 1.3750  | 1.000           |
|             | Jan-16.LV - Jan-16.MV        | -0.2438  | 0.1459     | -1.6710 | 1.000           |
|             | Jul-16.MV - Jul-16.HV        | 0.2732   | 0.1577     | 1.7320  | 1.000           |
|             | Jul-16.LV - Jul-16.HV        | 0.3772   | 0.1617     | 2.3330  | 0.2948          |
|             | Jul-16.LV - Jul-16.MV        | 0.1040   | 0.1517     | 0.6850  | 1.000           |
|             | Jul-16.HV - Jan-16.HV        | 0.0809   | 0.1202     | 0.6730  | 1.000           |
|             | Jul-16.MV - Jan-16.MV        | -0.1068  | 0.0878     | -1.2160 | 1.000           |
|             | Jul-16.LV - Jan-16.LV        | 0.2410   | 0.0967     | 2.4920  | 0.1905          |

---

---

**ANOVA**

Model: chlratio ~ time\*origin\_dest + Error(colony)

|  | Factor | Df | Sum Sq | Mean Sq | F value | Pr(>F) |
|--|--------|----|--------|---------|---------|--------|
|--|--------|----|--------|---------|---------|--------|

|                     |    |        |        |        |        |
|---------------------|----|--------|--------|--------|--------|
| Error: Between time | 1  | 0.0014 | 0.0014 | 0.0100 | 0.9230 |
| origin_dest         | 4  | 1.1673 | 0.2918 | 2.0850 | 0.1750 |
| time:origin_dest    | 1  | 0.2877 | 0.2877 | 2.0550 | 0.1900 |
| Residuals           | 8  | 1.1199 | 0.1400 |        |        |
| Error: Within time  | 1  | 0.0335 | 0.0335 | 0.8540 | 0.3650 |
| origin_dest         | 2  | 0.0464 | 0.0232 | 0.5920 | 0.5610 |
| time:origin_dest    | 4  | 0.2817 | 0.0704 | 1.7960 | 0.1640 |
| Residuals           | 23 | 0.9020 | 0.0392 |        |        |

**Tukey's Test (Bonferroni corrected)**

|                  | Contrast                    | Estimate | Std. Error | z value | Pr(> z ) |
|------------------|-----------------------------|----------|------------|---------|----------|
| origin_dest      | MV_HV - HV_HV               | 0.4011   | 0.1502     | 2.6700  | 0.07580  |
|                  | LV_HV - HV_HV               | 0.3134   | 0.1571     | 1.9950  | 0.4608   |
|                  | MV_MV - HV_HV               | 0.3436   | 0.1483     | 2.3180  | 0.2046   |
|                  | LV_LV - HV_HV               | 0.2582   | 0.1502     | 1.7180  | 0.8571   |
|                  | MV_MV - MV_HV               | -0.0575  | 0.0965     | -0.5950 | 1.000    |
|                  | LV_HV - MV_HV               | -0.0877  | 0.1590     | -0.5520 | 1.000    |
|                  | LV_LV - MV_HV               | -0.1430  | 0.1522     | -0.9400 | 1.000    |
|                  | LV_LV - LV_HV               | -0.0553  | 0.1109     | -0.4980 | 1.000    |
|                  | MV_MV - LV_HV               | 0.0302   | 0.1571     | 0.1920  | 1.000    |
|                  | LV_LV - MV_MV               | -0.0855  | 0.1502     | -0.5690 | 1.000    |
| time*origin_dest | Jan-16.MV_HV - Jan-16.HV_HV | 0.5204   | 0.1721     | 3.0250  | 0.1120   |
|                  | Jan-16.LV_HV - Jan-16.HV_HV | 0.2491   | 0.1795     | 1.3880  | 1.000    |
|                  | Jan-16.MV_MV - Jan-16.HV_HV | 0.4013   | 0.1721     | 2.3320  | 0.8860   |
|                  | Jan-16.LV_LV - Jan-16.HV_HV | 0.1945   | 0.1721     | 1.1300  | 1.000    |
|                  | Jan-16.MV_MV - Jan-16.MV_HV | -0.1191  | 0.1255     | -0.9490 | 1.000    |
|                  | Jan-16.LV_HV - Jan-16.MV_HV | -0.2713  | 0.1795     | -1.5120 | 1.000    |
|                  | Jan-16.LV_LV - Jan-16.MV_HV | -0.3259  | 0.1721     | -1.8940 | 1.000    |
|                  | Jan-16.LV_LV - Jan-16.LV_HV | -0.0546  | 0.1356     | -0.4030 | 1.000    |
|                  | Jan-16.LV_HV - Jan-16.MV_MV | -0.1523  | 0.1795     | -0.8480 | 1.000    |
|                  | Jan-16.LV_LV - Jan-16.MV_MV | -0.2068  | 0.1721     | -1.2020 | 1.000    |

|                             |         |        |         |       |
|-----------------------------|---------|--------|---------|-------|
| Jul-16.MV_HV - Jul-16.HV_HV | 0.2569  | 0.1790 | 1.4350  | 1.000 |
| Jul-16.LV_HV - Jul-16.HV_HV | 0.4179  | 0.1907 | 2.1910  | 1.000 |
| Jul-16.MV_MV - Jul-16.HV_HV | 0.2859  | 0.1721 | 1.6620  | 1.000 |
| Jul-16.LV_LV - Jul-16.HV_HV | 0.3490  | 0.1791 | 1.9480  | 1.000 |
| Jul-16.MV_MV - Jul-16.MV_HV | 0.0291  | 0.1349 | 0.2150  | 1.000 |
| Jul-16.LV_HV - Jul-16.MV_HV | 0.1610  | 0.1970 | 0.8170  | 1.000 |
| Jul-16.LV_LV - Jul-16.MV_HV | 0.0921  | 0.1858 | 0.4950  | 1.000 |
| Jul-16.LV_LV - Jul-16.LV_HV | -0.0689 | 0.1609 | -0.4280 | 1.000 |
| Jul-16.LV_HV - Jul-16.MV_MV | 0.1319  | 0.1907 | 0.6920  | 1.000 |
| Jul-16.LV_LV - Jul-16.MV_MV | 0.0630  | 0.1791 | 0.3520  | 1.000 |
| Jan-16.HV_HV - Jul-16.HV_HV | -0.0809 | 0.1255 | -0.6440 | 1.000 |
| Jan-16.MV_HV - Jul-16.MV_HV | 0.1827  | 0.1349 | 1.3540  | 1.000 |
| Jan-16.LV_HV - Jul-16.LV_HV | -0.2497 | 0.1543 | -1.6180 | 1.000 |
| Jan-16.MV_MV - Jul-16.MV_MV | 0.0345  | 0.1255 | 0.2750  | 1.000 |
| Jan-16.LV_LV - Jul-16.LV_LV | -0.2353 | 0.1351 | -1.7420 | 1.000 |

**CHL****D. Total Chlorophyll (control and heat)****Shapiro-wilk**

| Model: totalchl ~ time+o |               | time | origin    | dest      | trt         | p-value        |
|--------------------------|---------------|------|-----------|-----------|-------------|----------------|
| Jan-16                   | <b>Jan-16</b> |      | <b>HV</b> | <b>HV</b> | <b>cont</b> | <b>0.02567</b> |
|                          | Jan-16        |      | MV        | HV        | cont        | 0.3534         |
|                          | Jan-16        |      | LV        | HV        | cont        | 0.1598         |
|                          | <b>Jan-16</b> |      | <b>MV</b> | <b>MV</b> | <b>cont</b> | <b>0.00527</b> |
|                          | Jan-16        |      | LV        | LV        | cont        | 0.8198         |
|                          | Jan-16        |      | HV        | HV        | heat        | 0.3989         |
|                          | Jan-16        |      | MV        | HV        | heat        | 0.1726         |
|                          | Jan-16        |      | LV        | HV        | heat        | 0.9793         |
|                          | Jan-16        |      | MV        | MV        | heat        | 0.7432         |
|                          | Jan-16        |      | LV        | LV        | heat        | 0.1124         |
| Jul-16                   | Jul-16        |      | HV        | HV        | cont        | 0.8330         |
|                          | Jul-16        |      | MV        | HV        | cont        | 0.1121         |
|                          | Jul-16        |      | LV        | HV        | cont        | 0.6726         |
|                          | Jul-16        |      | MV        | MV        | cont        | 0.1662         |
|                          | Jul-16        |      | LV        | LV        | cont        | 0.5304         |
|                          | Jul-16        |      | HV        | HV        | heat        | 0.8063         |
|                          | Jul-16        |      | MV        | HV        | heat        | 0.3501         |
|                          | Jul-16        |      | LV        | HV        | heat        | 0.1002         |
|                          | Jul-16        |      | MV        | MV        | heat        | 0.1215         |
|                          | Jul-16        |      | LV        | LV        | heat        | 0.4485         |

**Bartlett HOV**

| Model: chlratio ~ time+o |        | time | K-squared | df | p-value |
|--------------------------|--------|------|-----------|----|---------|
|                          | Jan-16 |      | 10.7390   | 9  | 0.2940  |
|                          | Jul-16 |      | 4.8643    | 9  | 0.8460  |

**Summary**

| time | origin_dest_trt | mean | sd | min | Q1 | median | Q3 | max | n |
|------|-----------------|------|----|-----|----|--------|----|-----|---|
|------|-----------------|------|----|-----|----|--------|----|-----|---|

|                   |        |       |       |        |        |        |        |   |
|-------------------|--------|-------|-------|--------|--------|--------|--------|---|
| Jan-16 HV_HV_cont | 6.505  | 2.217 | 4.984 | 5.124  | 5.92   | 6.124  | 10.372 | 5 |
| HV_HV_heat        | 1.437  | 0.804 | 0.73  | 0.758  | 1.243  | 1.814  | 2.638  | 5 |
| LV_HV_cont        | 8.272  | 1.965 | 5.402 | 7.854  | 8.961  | 9.379  | 9.765  | 4 |
| LV_HV_heat        | 3.459  | 1.27  | 2.037 | 2.751  | 3.38   | 4.087  | 5.039  | 4 |
| LV_LV_cont        | 11.831 | 3.415 | 7.261 | 10.878 | 11.824 | 12.408 | 16.784 | 5 |
| LV_LV_heat        | 5.122  | 3.014 | 2.656 | 3.264  | 4.516  | 4.913  | 10.259 | 5 |
| MV_HV_cont        | 4.737  | 1.539 | 3.312 | 3.648  | 4.614  | 4.881  | 7.231  | 5 |
| MV_HV_heat        | 3.415  | 1.37  | 1.18  | 3.099  | 3.866  | 4.462  | 4.469  | 5 |
| MV_MV_cont        | 4.639  | 2.367 | 3.186 | 3.418  | 3.769  | 3.983  | 8.837  | 5 |
| MV_MV_heat        | 2.93   | 1.625 | 1.051 | 1.652  | 2.896  | 4.13   | 4.919  | 5 |
| Jul-16 HV_HV_cont | 3.715  | 0.849 | 2.477 | 3.296  | 3.965  | 4.164  | 4.671  | 5 |
| HV_HV_heat        | 0.973  | 0.742 | 0.179 | 0.406  | 0.943  | 1.297  | 2.042  | 5 |
| LV_HV_cont        | 3.534  | 1.629 | 1.768 | 2.812  | 3.855  | 4.417  | 4.979  | 3 |
| LV_HV_heat        | 1.75   | 0.753 | 0.882 | 1.514  | 2.145  | 2.184  | 2.224  | 3 |
| LV_LV_cont        | 6.414  | 0.911 | 5.182 | 6.204  | 6.545  | 6.755  | 7.383  | 4 |
| LV_LV_heat        | 4.642  | 0.51  | 3.952 | 4.412  | 4.771  | 5      | 5.074  | 4 |
| MV_HV_cont        | 3.502  | 1.3   | 2.355 | 2.399  | 3.425  | 4.528  | 4.806  | 4 |
| MV_HV_heat        | 2.197  | 1.284 | 1.04  | 1.17   | 2.033  | 3.061  | 3.684  | 4 |
| MV_MV_cont        | 4.967  | 1.2   | 3.991 | 4.259  | 4.374  | 5.28   | 6.932  | 5 |
| MV_MV_heat        | 2.87   | 0.962 | 1.24  | 2.909  | 3.039  | 3.514  | 3.646  | 5 |

## ANOVA

Model: totalchl ~ time\*origin\_dest\*trt + Error(colony)

|                | Factor             | Df | Sum Sq | Mean Sq | F value | Pr(>F)             |
|----------------|--------------------|----|--------|---------|---------|--------------------|
| Error: Between | <b>time</b>        | 1  | 32.89  | 32.89   | 13.849  | <b>0.007442</b>    |
|                | <b>origin_dest</b> | 4  | 184.25 | 46.06   | 19.398  | <b>0.000686</b>    |
|                | trt                | 1  | 0.21   | 0.21    | 0.09    | 0.7725             |
|                | time:origin_dest   | 1  | 8.46   | 8.46    | 3.561   | 0.1011             |
|                | <b>Residuals</b>   | 7  | 16.62  | 2.37    |         |                    |
| Error: Within  | <b>time</b>        | 1  | 58.33  | 58.33   | 28.488  | <b>&lt; 0.0001</b> |
|                | <b>origin_dest</b> | 2  | 28.79  | 14.4    | 7.031   | <b>0.001850</b>    |
|                | <b>trt</b>         | 1  | 204.34 | 204.34  | 99.797  | <b>&lt; 0.0001</b> |

|                             |    |        |       |       |                 |
|-----------------------------|----|--------|-------|-------|-----------------|
| <b>time:origin_dest</b>     | 4  | 39.44  | 9.86  | 4.815 | <b>0.002010</b> |
| <b>time:trt</b>             | 1  | 19.49  | 19.49 | 9.518 | <b>0.003120</b> |
| <b>origin_dest:trt</b>      | 4  | 34.88  | 8.72  | 4.258 | <b>0.004330</b> |
| <b>time:origin_dest:trt</b> | 4  | 21     | 5.25  | 2.564 | <b>0.04767</b>  |
| Residuals                   | 58 | 118.76 | 2.05  |       |                 |

**Tukey's Test (Bonferroni corrected)**

|                                                     | Contrast | Estimate | Std. Error | z value  | Pr(> z )           |
|-----------------------------------------------------|----------|----------|------------|----------|--------------------|
| time <b>Jul-16 - Jan-16</b>                         |          | -1.744   | 0.5956     | -2.928   | 0.003410           |
| origin_dest MV_HV - HV_HV                           |          | 0.3739   | 0.8481     | 0.441    | 1.000              |
| LV_HV - HV_HV                                       |          | 1.3267   | 0.9096     | 1.459    | 1.000              |
| MV_MV - HV_HV                                       |          | 0.6939   | 0.8255     | 0.841    | 1.000              |
| <b>LV_LV - HV_HV</b>                                |          | 4.0084   | 0.8481     | 4.73E+00 | <b>&lt; 0.0001</b> |
| LV_HV - MV_HV                                       |          | 0.9528   | 0.9302     | 1.024    | 1.000              |
| MV_MV - MV_HV                                       |          | 0.32     | 0.8481     | 0.377    | 1.000              |
| <b>LV_LV - MV_HV</b>                                |          | 3.6346   | 0.8701     | 4.177    | <b>0.0002950</b>   |
| MV_MV - LV_HV                                       |          | -0.6328  | 0.9096     | -0.696   | 1.000              |
| time*origin_dest*trt                                |          |          |            |          |                    |
| 16-Jan <b>Jan-16.HV_HV.heat - Jan-16.HV_HV.cont</b> |          | -5.0682  | 0.90949    | -5.573   | <b>&lt; 0.0001</b> |
| Jan-16.MV_HV.heat - Jan-16.MV_HV.cont               |          | -1.322   | 0.90949    | -1.454   | 1.000              |
| <b>Jan-16.LV_HV.heat - Jan-16.LV_HV.cont</b>        |          | -4.8135  | 1.01684    | -4.734   | <b>0.0004190</b>   |
| Jan-16.MV_MV.heat - Jan-16.MV_MV.cont               |          | -1.709   | 0.90949    | -1.879   | 1.000              |
| <b>Jan-16.LV_LV.heat - Jan-16.LV_LV.cont</b>        |          | -6.7094  | 0.90949    | -7.377   | <b>&lt; 0.0001</b> |
| Jan-16.MV_HV.heat - Jan-16.HV_HV.heat               |          | 1.9786   | 1.10737    | 1.787    | 1.000              |
| Jan-16.LV_HV.heat - Jan-16.HV_HV.heat               |          | 2.49669  | 1.16064    | 2.151    | 1.000              |
| Jan-16.MV_MV.heat - Jan-16.HV_HV.heat               |          | 1.493    | 1.10737    | 1.348    | 1.000              |
| Jan-16.LV_LV.heat - Jan-16.HV_HV.heat               |          | 3.685    | 1.10737    | 3.328    | 0.1664             |
| Jan-16.MV_MV.heat - Jan-16.MV_HV.heat               |          | -0.4856  | 0.90949    | -0.534   | 1.000              |
| Jan-16.LV_HV.heat - Jan-16.MV_HV.heat               |          | 0.51809  | 1.16064    | 0.446    | 1.000              |
| Jan-16.LV_LV.heat - Jan-16.MV_HV.heat               |          | 1.7064   | 1.10737    | 1.541    | 1.000              |
| Jan-16.LV_LV.heat - Jan-16.LV_HV.heat               |          | 1.18831  | 0.97364    | 1.22     | 1.000              |

|        |                                              |          |         |        |                    |
|--------|----------------------------------------------|----------|---------|--------|--------------------|
|        | Jan-16.LV_HV.heat - Jan-16.MV_MV.heat        | 1.00369  | 1.16064 | 0.865  | 1.000              |
|        | Jan-16.LV_LV.heat - Jan-16.MV_MV.heat        | 2.192    | 1.10737 | 1.979  | 1.000              |
|        | Jan-16.MV_HV.cont - Jan-16.HV_HV.cont        | -1.7676  | 1.10737 | -1.596 | 1.000              |
|        | Jan-16.LV_HV.cont - Jan-16.HV_HV.cont        | 2.24199  | 1.16064 | 1.932  | 1.000              |
|        | Jan-16.MV_MV.cont - Jan-16.HV_HV.cont        | -1.8662  | 1.10737 | -1.685 | 1.000              |
|        | <b>Jan-16.LV_LV.cont - Jan-16.HV_HV.cont</b> | 5.3262   | 1.10737 | 4.81   | <b>0.0002870</b>   |
|        | Jan-16.MV_MV.cont - Jan-16.MV_HV.cont        | -0.0986  | 0.90949 | -0.108 | 1.000              |
|        | Jan-16.LV_HV.cont - Jan-16.MV_HV.cont        | 4.00959  | 1.16064 | 3.455  | 0.1047             |
|        | <b>Jan-16.LV_LV.cont - Jan-16.MV_HV.cont</b> | 7.0938   | 1.10737 | 6.406  | <b>&lt; 0.0001</b> |
|        | Jan-16.LV_LV.cont - Jan-16.LV_HV.cont        | 3.08421  | 0.97364 | 3.168  | 0.2919             |
|        | Jan-16.LV_HV.cont - Jan-16.MV_MV.cont        | 4.10819  | 1.16064 | 3.54   | 0.07614            |
|        | <b>Jan-16.LV_LV.cont - Jan-16.MV_MV.cont</b> | 7.1924   | 1.10737 | 6.495  | <b>&lt; 0.0001</b> |
| 16-Jul | Jul-16.HV_HV.heat - Jul-16.HV_HV.cont        | -2.7412  | 0.90949 | -3.014 | 0.4899             |
|        | Jul-16.MV_HV.heat - Jul-16.MV_HV.cont        | -1.305   | 1.01684 | -1.283 | 1.000              |
|        | Jul-16.LV_HV.heat - Jul-16.LV_HV.cont        | -1.78367 | 1.17414 | -1.519 | 1.000              |
|        | Jul-16.MV_MV.heat - Jul-16.MV_MV.cont        | -2.0976  | 0.90949 | -2.306 | 1.000              |
|        | Jul-16.LV_LV.heat - Jul-16.LV_LV.cont        | -1.87106 | 1.03114 | -1.815 | 1.000              |
|        | Jul-16.MV_HV.heat - Jul-16.HV_HV.heat        | 1.54053  | 1.15866 | 1.33   | 1.000              |
|        | Jul-16.LV_HV.heat - Jul-16.HV_HV.heat        | 1.02966  | 1.2419  | 0.829  | 1.000              |
|        | Jul-16.MV_MV.heat - Jul-16.HV_HV.heat        | 1.8962   | 1.10737 | 1.712  | 1.000              |
|        | Jul-16.LV_LV.heat - Jul-16.HV_HV.heat        | 3.55196  | 1.15844 | 3.066  | 0.4120             |
|        | Jul-16.MV_MV.heat - Jul-16.MV_HV.heat        | 0.35567  | 0.97127 | 0.366  | 1.000              |
|        | Jul-16.LV_HV.heat - Jul-16.MV_HV.heat        | -0.51087 | 1.28784 | -0.397 | 1.000              |
|        | Jul-16.LV_LV.heat - Jul-16.MV_HV.heat        | 2.01143  | 1.20755 | 1.666  | 1.000              |
|        | Jul-16.LV_LV.heat - Jul-16.LV_HV.heat        | 2.5223   | 1.13135 | 2.229  | 1.000              |
|        | Jul-16.LV_HV.heat - Jul-16.MV_MV.heat        | -0.86654 | 1.2419  | -0.698 | 1.000              |
|        | Jul-16.LV_LV.heat - Jul-16.MV_MV.heat        | 1.65576  | 1.15844 | 1.429  | 1.000              |
|        | Jul-16.MV_HV.cont - Jul-16.HV_HV.cont        | 0.10433  | 1.15866 | 0.09   | 1.000              |
|        | Jul-16.LV_HV.cont - Jul-16.HV_HV.cont        | 0.07213  | 1.2419  | 0.058  | 1.000              |
|        | Jul-16.MV_MV.cont - Jul-16.HV_HV.cont        | 1.2526   | 1.10737 | 1.131  | 1.000              |
|        | Jul-16.LV_LV.cont - Jul-16.HV_HV.cont        | 2.68182  | 1.15844 | 2.315  | 1.000              |

|                   |                                              |                 |                |               |                    |
|-------------------|----------------------------------------------|-----------------|----------------|---------------|--------------------|
|                   | Jul-16.MV_MV.cont - Jul-16.MV_HV.cont        | 1.14827         | 0.97127        | 1.182         | 1.000              |
|                   | Jul-16.LV_HV.cont - Jul-16.MV_HV.cont        | -0.0322         | 1.28784        | -0.025        | 1.000              |
|                   | Jul-16.LV_LV.cont - Jul-16.MV_HV.cont        | 2.57749         | 1.20755        | 2.134         | 1.000              |
|                   | Jul-16.LV_LV.cont - Jul-16.LV_HV.cont        | 2.60969         | 1.13135        | 2.307         | 1.000              |
|                   | Jul-16.LV_HV.cont - Jul-16.MV_MV.cont        | -1.18047        | 1.2419         | -0.951        | 1.000              |
|                   | Jul-16.LV_LV.cont - Jul-16.MV_MV.cont        | 1.42922         | 1.15844        | 1.234         | 1.000              |
| Jan-16 vs. Jul-16 | Jul-16.HV_HV.heat - Jan-16.HV_HV.heat        | -0.4632         | 0.90949        | -0.509        | 1.000              |
|                   | Jul-16.HV_HV.cont - Jan-16.HV_HV.cont        | -2.7902         | 0.90949        | -3.068        | 0.4096             |
|                   | Jul-16.MV_HV.heat - Jan-16.MV_HV.heat        | -0.90127        | 0.97127        | -0.928        | 1.000              |
|                   | Jul-16.MV_HV.cont - Jan-16.MV_HV.cont        | -0.91827        | 0.97127        | -0.945        | 1.000              |
|                   | Jul-16.LV_HV.heat - Jan-16.LV_HV.heat        | -1.93023        | 1.10826        | -1.742        | 1.000              |
|                   | <b>Jul-16.LV_HV.cont - Jan-16.LV_HV.cont</b> | <b>-4.96006</b> | <b>1.10826</b> | <b>-4.476</b> | <b>0.001448</b>    |
|                   | Jul-16.MV_MV.heat - Jan-16.MV_MV.heat        | -0.06           | 0.90949        | -0.066        | 1.000              |
|                   | Jul-16.MV_MV.cont - Jan-16.MV_MV.cont        | 0.3286          | 0.90949        | 0.361         | 1.000              |
|                   | Jul-16.LV_LV.heat - Jan-16.LV_LV.heat        | -0.59624        | 0.97101        | -0.614        | 1.000              |
|                   | <b>Jul-16.LV_LV.cont - Jan-16.LV_LV.cont</b> | <b>-5.43458</b> | <b>0.97101</b> | <b>-5.597</b> | <b>&lt; 0.0001</b> |



**Table S6 *Goniastrea retiformis* physiology**

**WEEKLY GROWTH RATE**

**A. Growth (g) over Time ((final-initial) / weeks)**

**Shapiro-wilk**

| Model: grate ~ time+orig | time   | origin | dest | p-value |         |
|--------------------------|--------|--------|------|---------|---------|
|                          | Jan-16 | Jan-16 | HV   | HV      | 0.7828  |
|                          |        | Jan-16 | MV   | HV      | 0.8258  |
|                          |        | Jan-16 | LV   | HV      | 0.8234  |
|                          |        | Jan-16 | MV   | MV      | 0.6071  |
|                          | Jul-16 | Jul-16 | HV   | HV      | 0.05427 |
|                          |        | Jul-16 | MV   | HV      | 0.9189  |
|                          |        | Jul-16 | LV   | HV      | 0.3550  |
|                          |        | Jul-16 | MV   | MV      | 0.8627  |
|                          |        | Jul-16 | LV   | LV      | 0.9511  |

**Bartlett HOV**

| Model: grate ~ time+orig | time   | K-squared | df | p-value |
|--------------------------|--------|-----------|----|---------|
|                          | Jan-16 | 2.1946    | 3  | 0.5330  |
|                          | Jul-16 | 0.8560    | 4  | 0.9308  |

**Summary**

| time   | origin_dest | mean   | sd     | min    | Q1     | median | Q3     | max    | n |
|--------|-------------|--------|--------|--------|--------|--------|--------|--------|---|
| Jan-16 | HV_HV       | 0.0740 | 0.0190 | 0.0450 | 0.0700 | 0.0750 | 0.0850 | 0.0950 | 5 |
|        | MV_HV       | 0.0470 | 0.0090 | 0.0350 | 0.0450 | 0.0450 | 0.0500 | 0.0600 | 5 |
|        | MV_MV       | 0.0620 | 0.0110 | 0.0450 | 0.0600 | 0.0650 | 0.0650 | 0.0750 | 5 |
|        | LV_HV       | 0.0710 | 0.0140 | 0.0550 | 0.0600 | 0.0700 | 0.0800 | 0.0900 | 5 |
| Jul-16 | LV_LV       | NaN    | NA     | NA     | NA     | NA     | NA     | NA     | 0 |
|        | HV_HV       | 0.0880 | 0.0210 | 0.0700 | 0.0800 | 0.0800 | 0.0850 | 0.1250 | 5 |
|        | MV_HV       | 0.0630 | 0.0260 | 0.0300 | 0.0450 | 0.0650 | 0.0800 | 0.0950 | 5 |
|        | MV_MV       | 0.1290 | 0.0340 | 0.0900 | 0.1100 | 0.1200 | 0.1500 | 0.1750 | 5 |
|        | LV_HV       | 0.0680 | 0.0320 | 0.0400 | 0.0450 | 0.0550 | 0.0850 | 0.1150 | 5 |
|        | LV_LV       | 0.0400 | 0.0270 | 0.0100 | 0.0250 | 0.0380 | 0.0520 | 0.0750 | 4 |

---

---

**ANOVA**

---

Model: grate ~ time\*origin\_dest + Error(colony)

|                | Factor                  | Df | Sum Sq | Mean Sq | F value | Pr(>F)            |
|----------------|-------------------------|----|--------|---------|---------|-------------------|
| Error: Between | <b>time</b>             | 1  | 0.0053 | 0.0053  | 8.1820  | <b>0.01550</b>    |
|                | origin_dest             | 2  | 0.0014 | 0.0007  | 1.1040  | 0.3655            |
|                | residuals               | 11 | 0.0071 | 0.0006  |         |                   |
| Error: Within  | <b>time</b>             | 1  | 0.0040 | 0.0040  | 10.7760 | <b>0.003260</b>   |
|                | <b>origin_dest</b>      | 2  | 0.0109 | 0.0055  | 14.6980 | <b>&lt;0.0001</b> |
|                | <b>time:origin_dest</b> | 3  | 0.0069 | 0.0023  | 6.1470  | <b>0.003170</b>   |
|                | residuals               | 23 | 0.0085 | 0.0004  |         |                   |

**Tukey's Test**

---

|                  | Contrast                  | Estimate | Std. Error | z value | Pr(> z )        |
|------------------|---------------------------|----------|------------|---------|-----------------|
| origin_dest      | MV_HV-HV_HV               | -0.0260  | 0.0126     | -2.0710 | 0.2289          |
|                  | LV_HV-HV_HV               | -0.0115  | 0.0126     | -0.9160 | 0.8890          |
|                  | MV_MV-HV_HV               | 0.0145   | 0.0126     | 1.1550  | 0.7737          |
|                  | LV_LV-HV_HV               | -0.0410  | 0.0166     | -2.4690 | 0.09562         |
|                  | LV_HV-MV_HV               | 0.0145   | 0.0126     | 1.1550  | 0.7737          |
|                  | <b>MV_MV-MV_HV</b>        | 0.0405   | 0.0126     | 3.2260  | <b>0.01060</b>  |
|                  | LV_LV-MV_HV               | -0.0150  | 0.0166     | -0.9030 | 0.8940          |
|                  | MV_MV-LV_HV               | 0.0260   | 0.0126     | 2.0710  | 0.2289          |
|                  | LV_LV-LV_HV               | -0.0295  | 0.0166     | -1.7760 | 0.3827          |
|                  | <b>LV_LV-MV_MV</b>        | -0.0555  | 0.0166     | -3.3420 | <b>0.007330</b> |
| time*origin_dest |                           |          |            |         |                 |
| Jan-16           | Jan-16.MV_HV-Jan-16.HV_HV | -0.0270  | 0.0146     | -1.8460 | 0.6420          |
|                  | Jan-16.LV_HV-Jan-16.HV_HV | -0.0030  | 0.0146     | -0.2050 | 1.000           |
|                  | Jan-16.MV_MV-Jan-16.HV_HV | -0.0120  | 0.0146     | -0.8210 | 0.9961          |
|                  | Jan-16.LV_HV-Jan-16.MV_HV | 0.0240   | 0.0146     | 1.6410  | 0.7747          |
|                  | Jan-16.MV_MV-Jan-16.MV_HV | 0.0150   | 0.0124     | 1.2100  | 0.9523          |
|                  | Jan-16.MV_MV-Jan-16.LV_HV | -0.0090  | 0.0146     | -0.6150 | 0.9995          |

|                   |                                  |         |        |         |                  |
|-------------------|----------------------------------|---------|--------|---------|------------------|
| Jul-16            | Jul-16.MV_HV-Jul-16.HV_HV        | -0.0250 | 0.0146 | -1.7100 | 0.7330           |
|                   | Jul-16.LV_HV-Jul-16.HV_HV        | -0.0200 | 0.0146 | -1.3680 | 0.9060           |
|                   | Jul-16.MV_MV-Jul-16.HV_HV        | 0.0410  | 0.0146 | 2.8040  | 0.1107           |
|                   | Jul-16.LV_LV-Jul-16.HV_HV        | -0.0444 | 0.0154 | -2.8810 | 0.09085          |
|                   | Jul-16.LV_HV-Jul-16.MV_HV        | 0.0050  | 0.0146 | 0.3420  | 1.000            |
|                   | <b>Jul-16.MV_MV-Jul-16.MV_HV</b> | 0.0660  | 0.0124 | 5.3230  | <b>&lt;0.001</b> |
|                   | Jul-16.LV_LV-Jul-16.MV_HV        | -0.0194 | 0.0154 | -1.2580 | 0.9403           |
|                   | <b>Jul-16.MV_MV-Jul-16.LV_HV</b> | 0.0610  | 0.0146 | 4.1720  | <b>&lt;0.001</b> |
|                   | Jul-16.LV_LV-Jul-16.LV_HV        | -0.0244 | 0.0133 | -1.8320 | 0.6523           |
|                   | <b>Jul-16.LV_LV-Jul-16.MV_MV</b> | -0.0854 | 0.0154 | -5.5430 | <b>&lt;0.001</b> |
| Jan-16 vs. Jul-16 | Jul-16.HV_HV-Jan-16.HV_HV        | 0.0140  | 0.0124 | 1.1290  | 0.9683           |
|                   | Jul-16.MV_HV-Jan-16.MV_HV        | 0.0160  | 0.0124 | 1.2900  | 0.9314           |
|                   | Jul-16.LV_HV-Jan-16.LV_HV        | -0.0030 | 0.0124 | -0.2420 | 1.000            |
|                   | <b>Jul-16.MV_MV-Jan-16.MV_MV</b> | 0.0670  | 0.0124 | 5.4030  | <b>&lt;0.001</b> |

Fv/Fm

**B. Normalized Fv/Fm following heat stress ((0hr-21hr)/0hr)**

**Shapiro-wilk**

| Model: Fvfm ~ time+orig | time          | origin    | dest      | trt         | p-value         |
|-------------------------|---------------|-----------|-----------|-------------|-----------------|
| Jan-16                  | Jan-16        | HV        | HV        | heat        | 0.3392          |
|                         | Jan-16        | HV        | HV        | cont        | 0.6714          |
|                         | Jan-16        | MV        | HV        | heat        | 0.2319          |
|                         | Jan-16        | MV        | HV        | cont        | 0.6557          |
|                         | <b>Jan-16</b> | <b>MV</b> | <b>MV</b> | <b>heat</b> | <b>0.002411</b> |
|                         | Jan-16        | MV        | MV        | cont        | 0.7516          |
|                         | Jan-16        | LV        | HV        | heat        | 0.1755          |
|                         | Jan-16        | LV        | HV        | cont        | 0.8139          |
| Jul-16                  | Jul-16        | HV        | HV        | heat        | 0.4215          |
|                         | Jul-16        | HV        | HV        | cont        | 0.8722          |
|                         | Jul-16        | MV        | HV        | heat        | 0.1138          |
|                         | <b>Jul-16</b> | <b>MV</b> | <b>HV</b> | <b>cont</b> | <b>0.001938</b> |
|                         | Jul-16        | MV        | MV        | heat        | 0.7234          |
|                         | Jul-16        | MV        | MV        | cont        | 0.4404          |
|                         | <b>Jul-16</b> | <b>LV</b> | <b>HV</b> | <b>heat</b> | <b>0.03077</b>  |
|                         | Jul-16        | LV        | HV        | cont        | 0.2898          |
|                         | Jul-16        | LV        | LV        | heat        | 0.6048          |
|                         | Jul-16        | LV        | LV        | cont        | 0.4351          |

**Bartlett HOV**

| Model: Fvfm ~ time+orig | time   | K-squared | df | p-value |
|-------------------------|--------|-----------|----|---------|
|                         | Jan-16 | 3.2157    | 3  | 0.3595  |
|                         | Jul-16 | 4.6762    | 4  | 0.3222  |

**Summary**

| time   | origin_dest.trt | mean   | sd     | min    | Q1     | median | Q3     | max    | n |
|--------|-----------------|--------|--------|--------|--------|--------|--------|--------|---|
| Jan-16 | HV_HV.cont      | 0.9130 | 0.0280 | 0.8750 | 0.9040 | 0.9180 | 0.9280 | 0.9410 | 4 |
|        | HV_HV.heat      | 0.8560 | 0.0380 | 0.8250 | 0.8300 | 0.8440 | 0.8710 | 0.9090 | 4 |

|        |            |        |        |        |        |        |        |        |   |
|--------|------------|--------|--------|--------|--------|--------|--------|--------|---|
|        | MV_HV.cont | 0.9360 | 0.0330 | 0.8850 | 0.9270 | 0.9460 | 0.9490 | 0.9720 | 5 |
|        | MV_HV.heat | 0.9020 | 0.0390 | 0.8630 | 0.8760 | 0.8850 | 0.9390 | 0.9480 | 5 |
|        | LV_HV.cont | 0.9340 | 0.0370 | 0.8920 | 0.9040 | 0.9380 | 0.9510 | 0.9830 | 5 |
|        | LV_HV.heat | 0.8320 | 0.0490 | 0.7920 | 0.7970 | 0.8270 | 0.8330 | 0.9130 | 5 |
|        | MV_MV.cont | 0.8930 | 0.0200 | 0.8720 | 0.8790 | 0.8900 | 0.9000 | 0.9230 | 5 |
|        | MV_MV.heat | 0.8680 | 0.0630 | 0.7560 | 0.8890 | 0.8900 | 0.9000 | 0.9040 | 5 |
| Jul-16 | HV_HV.cont | 0.9590 | 0.0320 | 0.9170 | 0.9480 | 0.9610 | 0.9650 | 1.0050 | 5 |
|        | HV_HV.heat | 0.7430 | 0.1220 | 0.5920 | 0.6370 | 0.7890 | 0.8240 | 0.8730 | 5 |
|        | MV_HV.cont | 0.9400 | 0.0340 | 0.8790 | 0.9500 | 0.9550 | 0.9550 | 0.9590 | 5 |
|        | MV_HV.heat | 0.7220 | 0.1080 | 0.5450 | 0.6930 | 0.7820 | 0.7830 | 0.8060 | 5 |
|        | LV_HV.cont | 0.8920 | 0.0360 | 0.8530 | 0.8630 | 0.8840 | 0.9270 | 0.9310 | 5 |
|        | LV_HV.heat | 0.7830 | 0.0580 | 0.6820 | 0.7900 | 0.8060 | 0.8100 | 0.8250 | 5 |
|        | MV_MV.cont | 0.9360 | 0.0480 | 0.8630 | 0.9140 | 0.9460 | 0.9760 | 0.9790 | 5 |
|        | MV_MV.heat | 0.7120 | 0.1360 | 0.5420 | 0.6210 | 0.7080 | 0.8260 | 0.8650 | 5 |
|        | LV_LV.cont | 0.9480 | 0.0380 | 0.9060 | 0.9340 | 0.9610 | 0.9700 | 0.9780 | 3 |
|        | LV_LV.heat | 0.7650 | 0.1010 | 0.6540 | 0.7220 | 0.7890 | 0.8200 | 0.8520 | 3 |

## ANOVA

Model: Fvfm ~ time\*origin\*dest\*trt + Error(colony)

|                     | Factor          | Df | Sum Sq | Mean Sq | F value | Pr(>F)            |
|---------------------|-----------------|----|--------|---------|---------|-------------------|
| Error: Between time |                 |    |        |         |         |                   |
|                     | origin          | 2  | 0.0034 | 0.0017  | 0.2420  | 0.7890            |
|                     | dest            | 1  | 0.0001 | 0.0001  | 0.0130  | 0.9130            |
| Error: Within time  |                 |    |        |         |         |                   |
|                     | dest            | 2  | 0.0062 | 0.0031  | 0.8070  | 0.4516            |
|                     | <b>trt</b>      | 1  | 0.3484 | 0.3484  | 91.0520 | <b>&lt;0.0001</b> |
|                     | time:origin     | 2  | 0.0031 | 0.0015  | 0.4000  | 0.6726            |
|                     | time:dest       | 1  | 0.0026 | 0.0026  | 0.6690  | 0.4170            |
|                     | <b>time:trt</b> | 1  | 0.0967 | 0.0967  | 25.2640 | <b>&lt;0.0001</b> |
|                     | origin:trt      | 2  | 0.0026 | 0.0013  | 0.3450  | 0.7099            |
|                     | dest:trt        | 2  | 0.0001 | 0.0001  | 0.0150  | 0.9853            |

|                 |   |        |        |        |                |
|-----------------|---|--------|--------|--------|----------------|
| time:origin:trt | 2 | 0.0287 | 0.0144 | 3.7540 | <b>0.02970</b> |
| time:dest:trt   | 1 | 0.0001 | 0.0001 | 0.0320 | 0.8587         |

**Tukey's Test (Bonferroni corrected)**

|                   | Contrast                               | Estimate | Std. Error | z value | Pr(> z )          |
|-------------------|----------------------------------------|----------|------------|---------|-------------------|
| time              | <b>Jul-16 - Jan-16</b>                 | 0.0536   | 0.0214     | 2.5060  | <b>0.01220</b>    |
| time*trt          | <b>Jan-16.heat - Jan-16.cont</b>       | 0.0542   | 0.0200     | 2.7070  | <b>0.04068</b>    |
|                   | <b>Jul-16.heat - Jul-16.cont</b>       | 0.1905   | 0.0182     | 10.4770 | <b>&lt;0.0001</b> |
|                   | <b>Jul-16.heat - Jan-16.heat</b>       | 0.1230   | 0.0192     | 6.4160  | <b>&lt;0.0001</b> |
|                   | Jul-16.cont - Jan-16.cont              | -0.0133  | 0.0192     | -0.6960 | 1.000             |
| time*origin*trt   |                                        |          |            |         |                   |
| Jan-16            | Jan-16.HV.heat - Jan-16.HV.cont        | 0.0575   | 0.0428     | 1.3420  | 1.000             |
|                   | Jan-16.MV.heat - Jan-16.MV.cont        | 0.0293   | 0.0271     | 1.0810  | 1.000             |
|                   | Jan-16.LV.heat - Jan-16.LV.cont        | 0.1012   | 0.0383     | 2.6410  | 0.5455            |
|                   | Jan-16.MV.heat - Jan-16.HV.heat        | -0.0257  | 0.0392     | -0.6560 | 1.000             |
|                   | Jan-16.MV.cont - Jan-16.HV.cont        | 0.0025   | 0.0392     | 0.0630  | 1.000             |
|                   | Jan-16.LV.heat - Jan-16.HV.heat        | 0.0269   | 0.0436     | 0.6160  | 1.000             |
|                   | Jan-16.LV.cont - Jan-16.HV.cont        | -0.0168  | 0.0436     | -0.3850 | 1.000             |
|                   | Jan-16.MV.heat - Jan-16.LV.heat        | -0.0526  | 0.0365     | -1.4420 | 1.000             |
|                   | Jan-16.MV.cont - Jan-16.LV.cont        | 0.0193   | 0.0365     | 0.5290  | 1.000             |
| Jul-16            | <b>Jul-16.HV.heat - Jul-16.HV.cont</b> | 0.2162   | 0.0383     | 5.6420  | <b>&lt;0.0001</b> |
|                   | <b>Jul-16.MV.heat - Jul-16.MV.cont</b> | 0.2205   | 0.0271     | 8.1380  | <b>&lt;0.0001</b> |
|                   | <b>Jul-16.LV.heat - Jul-16.LV.cont</b> | 0.1369   | 0.0303     | 4.5180  | <b>0.0004</b>     |
|                   | Jul-16.MV.heat - Jul-16.HV.heat        | 0.0259   | 0.0365     | 0.7100  | 1.000             |
|                   | Jul-16.MV.cont - Jul-16.HV.cont        | 0.0216   | 0.0365     | 0.5920  | 1.000             |
|                   | Jul-16.LV.heat - Jul-16.HV.heat        | -0.0312  | 0.0378     | -0.8260 | 1.000             |
|                   | Jul-16.LV.cont - Jul-16.HV.cont        | 0.0481   | 0.0378     | 1.2720  | 1.000             |
|                   | Jul-16.MV.heat - Jul-16.LV.heat        | 0.0571   | 0.0326     | 1.7540  | 1.000             |
|                   | Jul-16.MV.cont - Jul-16.LV.cont        | -0.0265  | 0.0326     | -0.8130 | 1.000             |
| Jan-16 vs. Jul-16 | Jul-16.HV.heat - Jan-16.HV.heat        | 0.1163   | 0.0409     | 2.8420  | 0.2954            |

|                                        |         |        |         |                   |
|----------------------------------------|---------|--------|---------|-------------------|
| Jul-16.HV.cont - Jan-16.HV.cont        | -0.0424 | 0.0409 | -1.0370 | 1.000             |
| <b>Jul-16.MV.heat - Jan-16.MV.heat</b> | 0.1679  | 0.0271 | 6.1970  | <b>&lt;0.0001</b> |
| Jul-16.MV.cont - Jan-16.MV.cont        | -0.0233 | 0.0271 | -0.8600 | 1.000             |
| Jul-16.LV.heat - Jan-16.LV.heat        | 0.0582  | 0.0346 | 1.6800  | 1.000             |
| Jul-16.LV.cont - Jan-16.LV.cont        | 0.0225  | 0.0346 | 0.6490  | 1.000             |

## ANOVA

Model: Ylossnorm ~ time\*origin\_dest\*trt + Error(colony)

| Factor                    | Df | Sum Sq | Mean Sq | F value | Pr(>F)             |
|---------------------------|----|--------|---------|---------|--------------------|
| Error: Between time       | 1  | 0.0040 | 0.0040  | 0.5770  | 0.4650             |
| origin_dest               | 3  | 0.0035 | 0.0012  | 0.1660  | 0.9170             |
| Residuals                 | 10 | 0.0700 | 0.0070  |         |                    |
| Error: Within <b>time</b> | 1  | 0.0688 | 0.0688  | 17.9780 | <b>&lt; 0.0001</b> |
| origin_dest               | 2  | 0.0062 | 0.0031  | 0.8070  | 0.4516             |
| <b>trt</b>                | 1  | 0.3484 | 0.3484  | 91.0520 | <b>&lt; 0.0001</b> |
| time:origin_dest          | 3  | 0.0056 | 0.0019  | 0.4890  | 0.6911             |
| <b>time:trt</b>           | 1  | 0.0967 | 0.0967  | 25.2640 | <b>&lt; 0.0001</b> |
| origin_dest:trt           | 4  | 0.0028 | 0.0007  | 0.1800  | 0.9479             |
| time:origin_dest:trt      | 3  | 0.0289 | 0.0096  | 2.5130  | 0.06810            |
| Residuals                 | 54 | 0.2066 | 0.0038  |         |                    |

## Tukey's Test

| time*origin_dest*trt    | Contrast                              | Estimate | Std. Error | z value | Pr(> z ) |
|-------------------------|---------------------------------------|----------|------------|---------|----------|
| Jan-16 heat vs. control | Jan-16.HV_HV.heat - Jan-16.HV_HV.cont | 0.0575   | 0.0437     | 1.3150  | 0.9979   |
|                         | Jan-16.MV_HV.heat - Jan-16.MV_HV.cont | 0.0336   | 0.0391     | 0.8590  | 1.0000   |
|                         | Jan-16.LV_HV.heat - Jan-16.LV_HV.cont | 0.1012   | 0.0391     | 2.5870  | 0.4589   |
|                         | Jan-16.MV_MV.heat - Jan-16.MV_MV.cont | 0.0250   | 0.0391     | 0.6390  | 1.0000   |
| Jan-16 heat             | Jan-16.MV_HV.heat - Jan-16.HV_HV.heat | -0.0432  | 0.0442     | -0.9770 | 1.0000   |
|                         | Jan-16.LV_HV.heat - Jan-16.HV_HV.heat | 0.0266   | 0.0442     | 0.6010  | 1.0000   |
|                         | Jan-16.MV_MV.heat - Jan-16.HV_HV.heat | -0.0088  | 0.0442     | -0.1990 | 1.0000   |
|                         | Jan-16.LV_HV.heat - Jan-16.MV_HV.heat | 0.0698   | 0.0418     | 1.6710  | 0.9709   |
|                         | Jan-16.MV_MV.heat - Jan-16.MV_HV.heat | 0.0344   | 0.0391     | 0.8790  | 1.0000   |
|                         | Jan-16.MV_MV.heat - Jan-16.LV_HV.heat | -0.0354  | 0.0418     | -0.8470 | 1.0000   |

|                         |                                              |         |        |         |                   |
|-------------------------|----------------------------------------------|---------|--------|---------|-------------------|
| Jan-16 control          | Jan-16.MV_HV.cont - Jan-16.HV_HV.cont        | -0.0193 | 0.0442 | -0.4360 | 1.0000            |
|                         | Jan-16.LV_HV.cont - Jan-16.HV_HV.cont        | -0.0171 | 0.0442 | -0.3870 | 1.0000            |
|                         | Jan-16.MV_MV.cont - Jan-16.HV_HV.cont        | 0.0237  | 0.0442 | 0.5360  | 1.0000            |
|                         | Jan-16.LV_HV.cont - Jan-16.MV_HV.cont        | 0.0022  | 0.0418 | 0.0530  | 1.0000            |
|                         | Jan-16.MV_MV.cont - Jan-16.MV_HV.cont        | 0.0430  | 0.0391 | 1.0990  | 0.9998            |
|                         | Jan-16.MV_MV.cont - Jan-16.LV_HV.cont        | 0.0408  | 0.0418 | 0.9770  | 1.0000            |
| Jul-16 heat vs. control | <b>Jul-16.HV_HV.heat - Jul-16.HV_HV.cont</b> | 0.2162  | 0.0391 | 5.5270  | <b>&lt;0.0001</b> |
|                         | <b>Jul-16.MV_HV.heat - Jul-16.MV_HV.cont</b> | 0.2178  | 0.0391 | 5.5670  | <b>&lt;0.0001</b> |
|                         | Jul-16.LV_HV.heat - Jul-16.LV_HV.cont        | 0.1090  | 0.0391 | 2.7860  | 0.3181            |
|                         | <b>Jul-16.MV_MV.heat - Jul-16.MV_MV.cont</b> | 0.2232  | 0.0391 | 5.7050  | <b>&lt;0.0001</b> |
|                         | <b>Jul-16.LV_LV.heat - Jul-16.LV_LV.cont</b> | 0.1833  | 0.0505 | 3.6300  | <b>0.03030</b>    |
| Jul-16 heat             | Jul-16.MV_HV.heat - Jul-16.HV_HV.heat        | 0.0212  | 0.0418 | 0.5080  | 1.0000            |
|                         | Jul-16.LV_HV.heat - Jul-16.HV_HV.heat        | -0.0396 | 0.0418 | -0.9480 | 1.0000            |
|                         | Jul-16.MV_MV.heat - Jul-16.HV_HV.heat        | 0.0306  | 0.0418 | 0.7330  | 1.0000            |
|                         | Jul-16.LV_LV.heat - Jul-16.HV_HV.heat        | -0.0183 | 0.0480 | -0.3810 | 1.0000            |
|                         | Jul-16.MV_MV.heat - Jul-16.MV_HV.heat        | 0.0094  | 0.0391 | 0.2400  | 1.0000            |
|                         | Jul-16.LV_HV.heat - Jul-16.MV_HV.heat        | -0.0608 | 0.0418 | -1.4560 | 0.9931            |
|                         | Jul-16.LV_LV.heat - Jul-16.MV_HV.heat        | -0.0395 | 0.0480 | -0.8230 | 1.0000            |
|                         | Jul-16.MV_MV.heat - Jul-16.LV_HV.heat        | 0.0702  | 0.0418 | 1.6810  | 0.9691            |
|                         | Jul-16.LV_LV.heat - Jul-16.MV_MV.heat        | -0.0489 | 0.0480 | -1.0190 | 0.9999            |
|                         | Jul-16.LV_LV.heat - Jul-16.LV_HV.heat        | 0.0213  | 0.0457 | 0.4670  | 1.0000            |
| Jul-16 control          | Jul-16.MV_HV.cont - Jul-16.HV_HV.cont        | 0.0196  | 0.0418 | 0.4690  | 1.0000            |
|                         | Jul-16.LV_HV.cont - Jul-16.HV_HV.cont        | 0.0676  | 0.0418 | 1.6180  | 0.9787            |
|                         | Jul-16.MV_MV.cont - Jul-16.HV_HV.cont        | 0.0236  | 0.0418 | 0.5650  | 1.0000            |
|                         | Jul-16.LV_LV.cont - Jul-16.HV_HV.cont        | 0.0146  | 0.0480 | 0.3040  | 1.0000            |
|                         | Jul-16.MV_MV.cont - Jul-16.MV_HV.cont        | 0.0040  | 0.0391 | 0.1020  | 1.0000            |
|                         | Jul-16.LV_HV.cont - Jul-16.MV_HV.cont        | 0.0480  | 0.0418 | 1.1490  | 0.9996            |
|                         | Jul-16.LV_LV.cont - Jul-16.MV_HV.cont        | -0.0050 | 0.0480 | -0.1040 | 1.0000            |
|                         | Jul-16.MV_MV.cont - Jul-16.LV_HV.cont        | -0.0440 | 0.0418 | -1.0530 | 0.9999            |
|                         | Jul-16.LV_LV.cont - Jul-16.LV_HV.cont        | -0.0530 | 0.0457 | -1.1610 | 0.9996            |
|                         | Jul-16.LV_LV.cont - Jul-16.MV_MV.cont        | -0.0090 | 0.0480 | -0.1880 | 1.0000            |



|                   |                                              |         |        |         |                    |
|-------------------|----------------------------------------------|---------|--------|---------|--------------------|
| Jan-16 vs. Jul-16 | Jul-16.HV_HV.heat - Jan-16.HV_HV.heat        | 0.1160  | 0.0417 | 2.7790  | 0.3211             |
|                   | <b>Jul-16.MV_HV.heat - Jan-16.MV_HV.heat</b> | 0.1804  | 0.0391 | 4.6110  | <b>&lt;0.0100</b>  |
|                   | Jul-16.LV_HV.heat - Jan-16.LV_HV.heat        | 0.0498  | 0.0391 | 1.2730  | 0.9986             |
|                   | <b>Jul-16.MV_MV.heat - Jan-16.MV_MV.heat</b> | 0.1554  | 0.0391 | 3.9720  | <b>&lt; 0.0001</b> |
|                   | Jul-16.HV_HV.cont - Jan-16.HV_HV.cont        | -0.0427 | 0.0417 | -1.0230 | 0.9999             |
|                   | Jul-16.MV_HV.cont - Jan-16.MV_HV.cont        | -0.0038 | 0.0391 | -0.0970 | 1.0000             |
|                   | Jul-16.LV_HV.cont - Jan-16.LV_HV.cont        | 0.0420  | 0.0391 | 1.0740  | 0.9998             |
|                   | Jul-16.MV_MV.cont - Jan-16.MV_MV.cont        | -0.0428 | 0.0391 | -1.0940 | 0.9998             |

## CHL

### C. Total Chlorophyll Ratio (1-(control-heat)/control)

#### Shapiro-wilk

| Model: chlratio ~ time+origin+dest | time   | origin | dest | p-value |        |
|------------------------------------|--------|--------|------|---------|--------|
|                                    | Jan-16 | Jan-16 | HV   | HV      | 0.6371 |
|                                    |        | Jan-16 | MV   | HV      | 0.2933 |
|                                    |        | Jan-16 | MV   | MV      | 0.9573 |
|                                    |        | Jan-16 | LV   | HV      | 0.8825 |
|                                    | Jul-16 | Jul-16 | HV   | HV      | 0.3222 |
|                                    |        | Jul-16 | MV   | HV      | 0.5389 |
|                                    |        | Jul-16 | MV   | MV      | 0.5554 |
|                                    |        | Jul-16 | LV   | HV      | 0.1717 |
|                                    |        | Jul-16 | LV   | LV      | 0.5228 |

#### Bartlett HOV

| Model: chlratio ~ time+origin_dest | time          | K-squared | df | p-value        |
|------------------------------------|---------------|-----------|----|----------------|
|                                    | Jan-16        | 1.5667    | 3  | 0.6670         |
|                                    | <b>Jul-16</b> | 10.0580   | 4  | <b>0.03947</b> |

#### Summary

| time   | origin_dest | mean   | sd     | min    | Q1     | median | Q3     | max    | n |
|--------|-------------|--------|--------|--------|--------|--------|--------|--------|---|
| Jan-16 | HV_HV       | 0.6800 | 0.1360 | 0.5390 | 0.5980 | 0.6290 | 0.7590 | 0.8750 | 5 |
|        | MV_HV       | 0.7250 | 0.2040 | 0.5350 | 0.5950 | 0.6180 | 0.8660 | 1.0120 | 5 |
|        | MV_MV       | 0.6480 | 0.1100 | 0.4960 | 0.6140 | 0.6490 | 0.6830 | 0.7980 | 5 |
|        | LV_HV       | 0.7050 | 0.1890 | 0.5100 | 0.6150 | 0.7190 | 0.8030 | 0.8870 | 3 |
| Jul-16 | HV_HV       | 0.6330 | 0.1190 | 0.4360 | 0.6170 | 0.6730 | 0.6940 | 0.7460 | 5 |
|        | MV_HV       | 0.5040 | 0.1290 | 0.3810 | 0.3910 | 0.4940 | 0.5580 | 0.6940 | 5 |
|        | MV_MV       | 0.6450 | 0.3040 | 0.2520 | 0.5970 | 0.6030 | 0.6720 | 1.1020 | 5 |
|        | LV_HV       | 0.4360 | 0.2070 | 0.1780 | 0.2510 | 0.5240 | 0.6060 | 0.6220 | 5 |
|        | LV_LV       | 0.8240 | 0.5960 | 0.3310 | 0.4920 | 0.6530 | 1.0700 | 1.4860 | 3 |

#### ANOVA

Model: chlrat ~ time\*origin\_dest + Error(colony)

|                | Factor           | Df | Sum Sq | Mean Sq | F value | Pr(>F)         |
|----------------|------------------|----|--------|---------|---------|----------------|
| Error: Between | time             | 1  | 0.1651 | 0.1651  | 3.0590  | 0.1110         |
|                | origin_dest      | 3  | 0.2141 | 0.0714  | 1.3220  | 0.3210         |
|                | Residuals        | 10 | 0.5398 | 0.0540  |         |                |
| Error: Within  | <b>time</b>      | 1  | 0.2094 | 0.2094  | 5.4710  | <b>0.02980</b> |
|                | origin_dest      | 2  | 0.0450 | 0.0225  | 0.5890  | 0.5645         |
|                | time:origin_dest | 3  | 0.2539 | 0.0846  | 2.2120  | 0.1183         |
|                | Residuals        | 20 | 0.7654 | 0.0383  |         |                |

**Tukey's Test (Bonferroni corrected)**

---

|  | Contrast             | Estimate | Std. Error | z value | Pr(> z ) |
|--|----------------------|----------|------------|---------|----------|
|  | time Jan-16 - Jul-16 | 0.11334  | 0.06758    | 1.6770  | 0.09350  |

---

**D. Total Chlorophyll (control and heat)**

---

**Shapiro-wilk**

---

| Model: totalchl ~ origin+time+dest | time   | origin | dest | totalchl | p-value |
|------------------------------------|--------|--------|------|----------|---------|
| Jan-16                             | Jan-16 | HV     | HV   | cont     | 0.8659  |
|                                    | Jan-16 | HV     | HV   | heat     | 0.8399  |
|                                    | Jan-16 | MV     | HV   | cont     | 0.7286  |
|                                    | Jan-16 | MV     | MV   | cont     | 0.6472  |
|                                    | Jan-16 | MV     | HV   | heat     | 0.2830  |
|                                    | Jan-16 | MV     | MV   | heat     | 0.1244  |
|                                    | Jan-16 | LV     | HV   | cont     | 0.7202  |
|                                    | Jan-16 | LV     | HV   | heat     | 0.5631  |
| Jul-16                             | Jul-16 | HV     | HV   | cont     | 0.5288  |
|                                    | Jul-16 | HV     | HV   | heat     | 0.1293  |
|                                    | Jul-16 | MV     | HV   | cont     | 0.4584  |
|                                    | Jul-16 | MV     | MV   | cont     | 0.5670  |
|                                    | Jul-16 | MV     | HV   | heat     | 0.8153  |
|                                    | Jul-16 | MV     | MV   | heat     | 0.3280  |
|                                    | Jul-16 | LV     | HV   | cont     | 0.2118  |
|                                    | Jul-16 | LV     | LV   | cont     | 0.5669  |
|                                    | Jul-16 | LV     | HV   | heat     | 0.9143  |
|                                    | Jul-16 | LV     | LV   | heat     | 0.1170  |

---

**Bartlett HOV**

---

| Model: totalchl~origin_dest+trt | time   | K-squared | df | p-value |
|---------------------------------|--------|-----------|----|---------|
|                                 | Jan-16 | 3.2255    | 7  | 0.8634  |
|                                 | Jul-16 | 15.6320   | 9  | 0.07498 |

---

**Summary**

---

| time   | origin_dest_trt | mean   | sd     | min    | Q1     | median | Q3     | max    | n |
|--------|-----------------|--------|--------|--------|--------|--------|--------|--------|---|
| Jan-16 | HV_HV_cont      | 5.7460 | 1.1180 | 4.3520 | 4.9140 | 5.9770 | 6.3440 | 7.1440 | 5 |
|        | HV_HV_heat      | 3.8250 | 0.5930 | 3.0910 | 3.4180 | 3.8100 | 4.2730 | 4.5340 | 5 |

|        |            |        |        |        |        |        |        |         |   |
|--------|------------|--------|--------|--------|--------|--------|--------|---------|---|
|        | LV_HV_cont | 5.4570 | 0.9530 | 4.5940 | 4.9450 | 5.2960 | 5.8880 | 6.4800  | 3 |
|        | LV_HV_heat | 3.8110 | 1.0030 | 2.7030 | 3.3890 | 4.0740 | 4.3650 | 4.6570  | 3 |
|        | MV_HV_cont | 5.9660 | 0.5090 | 5.3680 | 5.7460 | 5.7650 | 6.2900 | 6.6630  | 5 |
|        | MV_HV_heat | 4.2590 | 0.9000 | 3.4170 | 3.5680 | 3.8860 | 4.9950 | 5.4310  | 5 |
|        | MV_MV_cont | 5.8140 | 0.6790 | 4.7970 | 5.7220 | 5.9120 | 5.9450 | 6.6950  | 5 |
|        | MV_MV_heat | 3.7760 | 0.8180 | 2.9300 | 2.9470 | 3.8580 | 4.5690 | 4.5750  | 5 |
| Jul-16 | HV_HV_cont | 7.5440 | 0.7050 | 6.4190 | 7.3830 | 7.6890 | 7.9950 | 8.2320  | 5 |
|        | HV_HV_heat | 4.7620 | 0.9040 | 3.2210 | 4.7860 | 5.0760 | 5.1750 | 5.5510  | 5 |
|        | LV_HV_cont | 7.4710 | 1.7460 | 5.6560 | 6.1680 | 6.8880 | 9.2460 | 9.3960  | 5 |
|        | LV_HV_heat | 2.9870 | 1.0130 | 1.6710 | 2.3220 | 3.2330 | 3.4270 | 4.2810  | 5 |
|        | LV_LV_cont | 5.6190 | 2.6430 | 2.7010 | 4.5030 | 6.3050 | 7.0780 | 7.8510  | 3 |
|        | LV_LV_heat | 3.5770 | 0.8500 | 2.5980 | 3.3070 | 4.0150 | 4.0670 | 4.1190  | 3 |
|        | MV_HV_cont | 8.1710 | 1.2420 | 6.7090 | 7.8250 | 8.0010 | 8.1810 | 10.1410 | 5 |
|        | MV_HV_heat | 4.0960 | 1.0970 | 2.6260 | 3.8600 | 3.9490 | 4.3680 | 5.6770  | 5 |
|        | MV_MV_cont | 7.8900 | 1.6540 | 5.8290 | 6.5350 | 8.3040 | 9.0970 | 9.6860  | 5 |
|        | MV_MV_heat | 5.2230 | 3.2920 | 2.0890 | 3.4770 | 4.3930 | 5.4820 | 10.6740 | 5 |

## ANOVA

Model: totalchl ~ time\*origin\_dest\*trt + Error(colony)

|                     | Factor               | Df | Sum Sq   | Mean Sq  | F value | Pr(>F)            |
|---------------------|----------------------|----|----------|----------|---------|-------------------|
| Error: Between time |                      |    |          |          |         |                   |
|                     | origin_dest          | 3  | 2.7390   | 0.9130   | 0.3590  | 0.7840            |
|                     | Residuals            | 10 | 25.4010  | 2.5400   |         |                   |
| Error: Within time  |                      |    |          |          |         |                   |
|                     | origin_dest          | 2  | 0.6700   | 0.3400   | 0.1860  | 0.8309            |
|                     | <b>trt</b>           | 1  | 146.0500 | 146.0500 | 80.6790 | <b>&lt;0.0001</b> |
|                     | time:origin_dest     | 3  | 2.1300   | 0.7100   | 0.3930  | 0.7588            |
|                     | <b>time:trt</b>      | 1  | 10.8100  | 10.8100  | 5.9730  | <b>0.01796</b>    |
|                     | origin_dest:trt      | 4  | 5.2300   | 1.3100   | 0.7220  | 0.5806            |
|                     | time:origin_dest:trt | 3  | 4.0400   | 1.3500   | 0.7440  | 0.5309            |
|                     | Residuals            | 52 | 94.1300  | 1.8100   |         |                   |

## Tukey's Test (Bonferroni corrected)

|                         | Contrast                         | Estimate       | Std. Error    | z value        | Pr(> z )          |
|-------------------------|----------------------------------|----------------|---------------|----------------|-------------------|
| time                    | <b>Jan-16 - Jul-16</b>           | -0.9789        | 0.4369        | -2.2410        | <b>0.02510</b>    |
| trt                     | <b>heat - cont</b>               | -2.6691        | 0.3242        | -8.2330        | <b>&lt;0.0001</b> |
| time*trt                | <b>Jan-16.heat - Jan-16.cont</b> | -1.8482        | 0.4277        | -4.3210        | <b>&lt;0.0001</b> |
|                         | <b>Jul-16.heat - Jul-16.cont</b> | -3.3116        | 0.3784        | -8.7520        | <b>&lt;0.0001</b> |
|                         | <b>Jan-16.cont - Jul-16.cont</b> | -1.8360        | 0.4080        | -4.5000        | <b>&lt;0.0001</b> |
|                         | Jan-16.heat - Jul-16.heat        | -0.3727        | 0.4080        | -0.9130        | 1.000             |
| time*origin_dest*trt    |                                  |                |               |                |                   |
| Jan-16 heat vs. control | HV_HV.heat - HV_HV.cont          | -1.9210        | 0.8362        | -2.2970        | 1.000             |
|                         | MV_MV.heat - MV_HV.cont          | -1.7070        | 0.8362        | -2.0410        | 1.000             |
|                         | MV_MV.heat - MV_MV.cont          | -1.6453        | 1.0795        | -1.5240        | 1.000             |
|                         | LV_HV.heat - LV_HV.cont          | -2.0384        | 0.8362        | -2.4380        | 1.000             |
| Jan-16 heat             | MV_HV.heat - HV_HV.heat          | 0.4342         | 0.8682        | 0.5000         | 1.000             |
|                         | LV_HV.heat - HV_HV.heat          | -0.0558        | 1.0008        | -0.0560        | 1.000             |
|                         | MV_MV.heat - HV_HV.heat          | -0.0494        | 0.8682        | -0.0570        | 1.000             |
|                         | LV_HV.heat - MV_HV.heat          | 0.4900         | 1.0008        | 0.4900         | 1.000             |
|                         | MV_MV.heat - MV_HV.heat          | -0.4836        | 0.8362        | -0.5780        | 1.000             |
|                         | MV_MV.heat - LV_HV.heat          | 0.0064         | 1.0008        | 0.0060         | 1.000             |
| Jan-16 control          | MV_HV.cont - HV_HV.cont          | 0.2202         | 0.8682        | 0.2540         | 1.000             |
|                         | LV_HV.cont - HV_HV.cont          | -0.3314        | 1.0008        | -0.3310        | 1.000             |
|                         | MV_MV.cont - HV_HV.cont          | 0.0680         | 0.8682        | 0.0780         | 1.000             |
|                         | LV_HV.cont - MV_HV.cont          | 0.5516         | 1.0008        | 0.5510         | 1.000             |
|                         | MV_MV.cont - MV_HV.cont          | -0.1522        | 0.8362        | -0.1820        | 1.000             |
|                         | MV_MV.cont - LV_HV.cont          | 0.3994         | 1.0008        | 0.3990         | 1.000             |
| Jul-16 heat vs. control | HV_HV.heat - HV_HV.cont          | -2.7818        | 0.8362        | -3.3270        | 0.1345            |
|                         | <b>MV_HV.heat - MV_HV.cont</b>   | <b>-4.0754</b> | <b>0.8362</b> | <b>-4.8740</b> | <b>0.0001680</b>  |
|                         | <b>LV_HV.heat - LV_HV.cont</b>   | <b>-4.4840</b> | <b>0.8362</b> | <b>-5.3620</b> | <b>&lt;0.0001</b> |
|                         | MV_MV.heat - MV_MV.cont          | -2.6672        | 0.8362        | -3.1900        | 0.2179            |
|                         | LV_LV.heat - LV_LV.cont          | -2.0417        | 1.0795        | -1.8910        | 1.000             |

|                   |                         |         |        |         |       |
|-------------------|-------------------------|---------|--------|---------|-------|
| Jul-16 heat       | MV_HV.heat - HV_HV.heat | -0.6658 | 0.8682 | -0.7670 | 1.000 |
|                   | LV_HV.heat - HV_HV.heat | -1.7750 | 0.8682 | -2.0440 | 1.000 |
|                   | MV_MV.heat - HV_HV.heat | 0.4612  | 0.8682 | 0.5310  | 1.000 |
|                   | LV_LV.heat - HV_HV.heat | -1.1352 | 1.0008 | -1.1340 | 1.000 |
|                   | LV_HV.heat - MV_HV.heat | 1.1092  | 0.8682 | 1.2780  | 1.000 |
|                   | MV_MV.heat - MV_HV.heat | 1.1270  | 0.8362 | 1.3480  | 1.000 |
|                   | LV_LV.heat - MV_HV.heat | 0.4694  | 1.0008 | 0.4690  | 1.000 |
|                   | MV_MV.heat - LV_HV.heat | 2.2362  | 0.8682 | 2.5760  | 1.000 |
|                   | LV_LV.heat - LV_HV.heat | 0.6398  | 0.9731 | 0.6580  | 1.000 |
|                   | LV_LV.heat - MV_MV.heat | 1.5964  | 1.0008 | 1.5950  | 1.000 |
| Jul-16 control    | MV_HV.cont - HV_HV.cont | 0.6278  | 0.8682 | 0.7230  | 1.000 |
|                   | LV_HV.cont - HV_HV.cont | -0.0728 | 0.8682 | -0.0840 | 1.000 |
|                   | MV_MV.cont - HV_HV.cont | 0.3466  | 0.8682 | 0.3990  | 1.000 |
|                   | LV_LV.cont - HV_HV.cont | -1.8753 | 1.0008 | -1.8740 | 1.000 |
|                   | LV_HV.cont - MV_HV.cont | 0.7006  | 0.8682 | 0.8070  | 1.000 |
|                   | MV_MV.cont - MV_HV.cont | -0.2812 | 0.8362 | -0.3360 | 1.000 |
|                   | LV_LV.cont - MV_HV.cont | 2.5031  | 1.0008 | 2.5010  | 1.000 |
|                   | MV_MV.cont - LV_HV.cont | 0.4194  | 0.8682 | 0.4830  | 1.000 |
|                   | LV_LV.cont - LV_HV.cont | -1.8025 | 0.9731 | -1.8520 | 1.000 |
|                   | LV_LV.cont - MV_MV.cont | 2.2219  | 1.0008 | 2.2200  | 1.000 |
| Jan-16 vs. Jul-16 | HV_HV.heat - HV_HV.heat | 0.9366  | 0.8362 | 1.1200  | 1.000 |
|                   | MV_HV.heat - MV_HV.heat | -0.1634 | 0.8362 | -0.1950 | 1.000 |
|                   | LV_HV.heat - LV_HV.heat | -0.7826 | 0.9731 | -0.8040 | 1.000 |
|                   | MV_MV.heat - MV_MV.heat | 1.4472  | 0.8362 | 1.7310  | 1.000 |
|                   | HV_HV.cont - HV_HV.cont | 1.7974  | 0.8362 | 2.1490  | 1.000 |
|                   | MV_HV.cont - MV_HV.cont | 2.2050  | 0.8362 | 2.6370  | 1.000 |
|                   | LV_HV.cont - LV_HV.cont | 2.0560  | 0.9731 | 2.1130  | 1.000 |
|                   | MV_MV.cont - MV_MV.cont | 2.0760  | 0.8362 | 2.4830  | 1.000 |

**Table S7 Symbiodiniaceae genotyping**

**A. Symbiodiniaceae ITS-2 Amplicon Sequencing and DADA2 Summary**

|                      | N  | Input  | Filtered | Denois | Merged | Tabled | onchimer | Mapped |
|----------------------|----|--------|----------|--------|--------|--------|----------|--------|
| <i>P. lobata</i>     | 79 | 367307 | 289420   | 289420 | 2086   | 2716   | 2716     | 282349 |
| HV                   | 25 | 111735 | 98299    | 98299  | 470    | 562    | 562      | 95286  |
| MV                   | HV | 5      | 47020    | 32042  | 32042  | 319    | 319      | 31376  |
|                      | MV | 23     | 80810    | 50210  | 50210  | 430    | 779      | 49173  |
| LV                   | HV | 6      | 27959    | 22591  | 22591  | 160    | 227      | 22211  |
|                      | LV | 20     | 99783    | 86278  | 86278  | 707    | 829      | 84303  |
| <i>G. retiformis</i> | 58 | 121221 | 84153    | 84153  | 621    | 2124   | 2124     | 82905  |
| HV                   | 19 | 71172  | 41050    | 41050  | 352    | 744    | 744      | 40393  |
| MV                   | HV | 5      | 15526    | 13158  | 13158  | 55     | 161      | 12990  |
|                      | MV | 14     | 33540    | 29263  | 29263  | 214    | 537      | 28852  |
| LV                   | HV | 4      | 184      | 182    | 182    | 0      | 182      | 183    |
|                      | LV | 16     | 799      | 500    | 500    | 0      | 500      | 487    |

**B. Symbiodiniaceae Read Counts**

| Species                            | Time   | Site                               | g      | C15   | C3    | C40   | C15b  | C3e   | C39   | C1    | A4a   | C60   | B2    | C2    | C21   | C3k   | Number |       |       |       |       |
|------------------------------------|--------|------------------------------------|--------|-------|-------|-------|-------|-------|-------|-------|-------|-------|-------|-------|-------|-------|--------|-------|-------|-------|-------|
| <i>P. lobata</i>                   | Jul-15 | HV                                 | side   | 33273 | 18    | 62    | 0     | 18    | 0     | 0     | 0     | 0     | 0     | 0     | 0     | 0     | 0      | 33371 |       |       |       |
|                                    |        |                                    | top    | 21896 | 10    | 0     | 0     | 0     | 10    | 0     | 0     | 0     | 0     | 0     | 0     | 0     | 0      | 0     | 21916 |       |       |
|                                    |        | MV                                 | side   | 20240 | 32    | 0     | 0     | 0     | 0     | 32    | 0     | 0     | 0     | 0     | 0     | 0     | 0      | 0     | 0     | 20304 |       |
|                                    |        |                                    | top    | 15069 | 0     | 264   | 0     | 0     | 0     | 0     | 0     | 0     | 0     | 0     | 102   | 0     | 0      | 0     | 0     | 15435 |       |
|                                    |        | LV                                 | side   | 22260 | 11    | 79    | 0     | 11    | 0     | 0     | 0     | 14    | 0     | 0     | 0     | 65    | 0      | 0     | 0     | 22440 |       |
|                                    |        |                                    | top    | 30751 | 0     | 0     | 28    | 0     | 0     | 0     | 0     | 0     | 0     | 0     | 0     | 0     | 0      | 0     | 0     | 30779 |       |
|                                    |        | <b>Average Relative Proportion</b> |        |       |       | 0.993 | 0.001 | 0.004 | 0.000 | 0.000 | 0.000 | 0.000 | 0.000 | 0.000 | 0.001 | 0.000 | 0.000  | 0.000 | 0.000 |       |       |
|                                    |        | <i>P. lobata</i>                   | Jan-16 | HV    | HV    | 39877 | 60    | 0     | 0     | 0     | 60    | 0     | 0     | 0     | 0     | 0     | 0      | 0     | 0     | 39997 |       |
|                                    |        |                                    |        |       | MV    | HV    | 31121 | 15    | 110   | 0     | 0     | 15    | 114   | 0     | 16    | 0     | 0      | 0     | 0     | 0     | 0     |
|                                    |        |                                    |        | MV    |       | 13125 | 26    | 0     | 0     | 0     | 26    | 0     | 0     | 0     | 0     | 0     | 51     | 0     | 0     | 0     | 13228 |
| LV                                 | HV     |                                    |        | 22203 | 6     | 0     | 8     | 0     | 6     | 0     | 0     | 0     | 0     | 0     | 0     | 0     | 0      | 0     | 0     | 22223 |       |
|                                    | LV     |                                    |        | 30951 | 58    | 0     | 17    | 0     | 58    | 0     | 58    | 0     | 0     | 0     | 0     | 0     | 0      | 0     | 0     | 31084 |       |
| <b>Average Relative Proportion</b> |        |                                    |        | 0.995 | 0.001 | 0.001 | 0.000 | 0.000 | 0.001 | 0.001 | 0.000 | 0.000 | 0.000 | 0.001 | 0.000 | 0.000 | 0.000  |       |       |       |       |



|                   |        |                                    |      |       |       |       |       |       |       |       |       |       |       |       |       |       |       |
|-------------------|--------|------------------------------------|------|-------|-------|-------|-------|-------|-------|-------|-------|-------|-------|-------|-------|-------|-------|
|                   |        | HV                                 | HV   | 90    | 0     | 0     | 0     | 0     | 0     | 0     | 0     | 0     | 0     | 0     | 0     | 90    |       |
|                   | Jul-16 | MV                                 | MV   | 230   | 0     | 0     | 0     | 0     | 0     | 0     | 0     | 0     | 0     | 0     | 0     | 230   |       |
|                   |        | LV                                 | LV   | 114   | 0     | 0     | 0     | 0     | 0     | 0     | 0     | 0     | 0     | 0     | 0     | 114   |       |
|                   |        | <b>Average Relative Proportion</b> |      | 1.000 | 0.000 | 0.000 | 0.000 | 0.000 | 0.000 | 0.000 | 0.000 | 0.000 | 0.000 | 0.000 | 0.000 | 0.000 |       |
|                   |        | HV                                 | side | 139   | 351   | 1860  | 0     | 0     | 0     | 0     | 0     | 0     | 0     | 32    | 0     | 2382  |       |
|                   |        |                                    | top  | 43    | 1368  | 11582 | 0     | 12    | 0     | 0     | 0     | 0     | 0     | 31    | 0     | 13036 |       |
|                   | Jul-15 | MV                                 | side | 0     | 607   | 4942  | 0     | 0     | 0     | 0     | 0     | 0     | 0     | 57    | 0     | 5606  |       |
|                   |        |                                    | top  | 43    | 0     | 180   | 0     | 0     | 0     | 0     | 0     | 0     | 0     | 0     | 0     | 223   |       |
|                   |        | LV                                 | side | 0     | 0     | 73    | 0     | 136   | 0     | 0     | 0     | 0     | 0     | 0     | 0     | 209   |       |
|                   |        |                                    | top  | 14    | 0     | 64    | 0     | 15    | 0     | 0     | 0     | 0     | 0     | 0     | 0     | 93    |       |
|                   |        | <b>Average Relative Proportion</b> |      | 0.068 | 0.060 | 0.733 | 0.000 | 0.135 | 0.000 | 0.000 | 0.000 | 0.000 | 0.000 | 0.004 | 0.000 |       |       |
| G.                |        | HV                                 | HV   | 640   | 2722  | 21297 | 0     | 0     | 0     | 109   | 0     | 0     | 0     | 0     | 219   | 0     | 24987 |
| <i>retiformis</i> |        | MV                                 | HV   | 9208  | 480   | 3215  | 10    | 0     | 0     | 42    | 0     | 0     | 0     | 0     | 45    | 0     | 13000 |
|                   | Jan-16 |                                    | MV   | 14439 | 828   | 7697  | 66    | 0     | 0     | 0     | 0     | 0     | 0     | 0     | 59    | 0     | 23089 |
|                   |        | LV                                 | HV   | 0     | 0     | 63    | 0     | 120   | 0     | 0     | 0     | 0     | 0     | 0     | 0     | 0     | 183   |
|                   |        |                                    | LV   | 0     | 0     | 123   | 0     | 34    | 0     | 0     | 0     | 0     | 0     | 0     | 0     | 13    | 170   |
|                   |        | <b>Average Relative Proportion</b> |      | 0.27  | 0.036 | 0.500 | 0.001 | 0.171 | 0.000 | 0.002 | 0.000 | 0.000 | 0.000 | 0.000 | 0.003 | 0.015 |       |

### C. Symbiodiniaceae Type BLASTn Results

| Query ID                  | ITS2 type | Accession #         | %QueryCover | QueryLength | Gaps | Mismatch | QueryStart | QueryEnd | MatchStart | MatchEnd | E-value | MaxScore |
|---------------------------|-----------|---------------------|-------------|-------------|------|----------|------------|----------|------------|----------|---------|----------|
| <b>GeoSymbio Database</b> |           |                     |             |             |      |          |            |          |            |          |         |          |
| seq1                      | C15       | AY239369            | 100         | 283         | 0    | 0        | 1          | 283      | 1          | 283      | 4E-147  | 511      |
| seq4                      | C3        | AF499789            | 100         | 283         | 0    | 0        | 1          | 283      | 1          | 283      | 4E-147  | 511      |
| seq2                      | C40       | AY258485            | 100         | 283         | 0    | 0        | 1          | 283      | 1          | 283      | 4E-147  | 511      |
| seq100                    | C15b      | AY258491            | 93.99       | 283         | 0    | 1        | 1          | 266      | 1          | 283      | 4E-127  | 444      |
| seq99                     |           | D1_AF334660         | 100         | 271         | 0    | 0        | 1          | 271      | 1          | 271      | 1E-140  | 489      |
| seq43                     |           | C1023_DQ335339      | 93          | 243         | 6    | 2        | 1          | 235      | 1          | 240      | 1E-102  | 363      |
| seq51                     | C1        | AF333515            | 100         | 283         | 0    | 0        | 1          | 283      | 1          | 283      | 4E-147  | 511      |
| seq110                    | A4a       | AF499778            | 100         | 255         | 0    | 0        | 1          | 255      | 1          | 255      | 6E-132  | 461      |
| seq107                    | C60       | AY589764            | 100         | 159         | 0    | 0        | 55         | 213      | 125        | 283      | 6E-80   | 288      |
| seq69                     | B2        | AF333512            | 99.64       | 275         | 1    | 0        | 1          | 275      | 1          | 275      | 4E-141  | 491      |
| seq68                     |           | C1233_EU118161      | 100         | 193         | 0    | 0        | 48         | 240      | 91         | 283      | 2E-98   | 349      |
| seq29                     | C21       | C21/3d/C3k_AY299.28 | 99.28       | 276         | 2    | 0        | 1          | 276      | 1          | 276      | 1E-140  | 489      |
| SEQ8                      | C3k       | AY589737            | 100         | 175         | 0    | 0        | 1          | 175      | 1          | 175      | 9E-89   | 316      |
| <b>SSantos Database</b>   |           |                     |             |             |      |          |            |          |            |          |         |          |
| seq1                      | C15       |                     | 100         | 283         | 0    | 0        | 1          | 283      | 1          | 283      | 1E-147  | 511      |
| seq4                      | C3        |                     | 100         | 283         | 0    | 0        | 1          | 283      | 1          | 283      | 1E-147  | 511      |
| seq2                      | C40       |                     | 100         | 283         | 0    | 0        | 1          | 283      | 1          | 283      | 1E-147  | 511      |
| seq100                    | C15b      |                     | 93.99       | 283         | 0    | 1        | 1          | 266      | 1          | 283      | 2E-127  | 444      |
| seq99                     | C3e       |                     | 94.2        | 69          | 4    | 0        | 1          | 69       | 1          | 69       | 3E-26   | 107      |
| seq43                     | C39       |                     | 86.25       | 269         | 3    | 1        | 1          | 235      | 1          | 269      | 1E-97   | 345      |
| seq51                     | C1        |                     | 100         | 283         | 0    | 0        | 1          | 283      | 1          | 283      | 1E-147  | 511      |
| seq110                    | A4a       |                     | 100         | 259         | 0    | 0        | 1          | 259      | 1          | 259      | 1E-134  | 468      |
| seq107                    | C60       |                     | 100         | 159         | 0    | 0        | 55         | 213      | 125        | 283      | 2E-80   | 288      |
| seq69                     | B2        |                     | 99.65       | 289         | 1    | 0        | 1          | 289      | 1          | 289      | 3E-149  | 517      |
| seq68                     | C2        |                     | 100         | 193         | 0    | 0        | 48         | 240      | 91         | 283      | 8E-99   | 349      |
| seq29                     | C21       |                     | 98.91       | 276         | 3    | 0        | 1          | 276      | 1          | 276      | 2E-139  | 484      |
| SEQ8                      | C3k       |                     | 100         | 175         | 0    | 0        | 1          | 175      | 1          | 175      | 3E-89   | 316      |

**D. Adjusted p-values between Multiple Comparisons of *Cladocopium* ITS type C40 in *P. lobata* colonies**

|              | HV_HV:Jul-15 | HV_HV:Jan-16 | HV_HV:Jul-16 | LV_LV:Jul-15 | LV_LV:Jan-16 | LV_LV:Jul-16 | LV_HV:Jul-15 | LV_HV:Jan-16 | LV_HV:Jul-16 | MV_HV:Jul-15 |
|--------------|--------------|--------------|--------------|--------------|--------------|--------------|--------------|--------------|--------------|--------------|
| HV_HV:Jul-15 | NA           | -33.053      | -38.690      | -67.691      | 93.763       | -112.305     | 56.592       | -29.818      | -1607.520    | 609.216      |
| HV_HV:Jan-16 | 1.000        | NA           | -5.637       | -34.638      | 126.816      | -79.251      | 89.645       | 3.235        | -1574.466    | 642.269      |
| HV_HV:Jul-16 | 1.000        | 1.000        | NA           | -29.001      | 132.453      | -73.615      | 95.282       | 8.872        | -1568.830    | 647.906      |
| LV_LV:Jul-15 | 1.000        | 1.000        | 1.000        | NA           | 161.454      | -44.614      | 124.283      | 37.873       | -1539.828    | 676.907      |
| LV_LV:Jan-16 | 1.000        | 1.000        | 1.000        | 1.000        | NA           | -206.067     | -37.171      | -123.581     | -1701.282    | 515.454      |
| LV_LV:Jul-16 | 1.000        | 1.000        | 1.000        | 1.000        | 0.2214       | NA           | 168.897      | 82.486       | -1495.215    | 721.521      |
| LV_HV:Jul-15 | 1.000        | 1.000        | 1.000        | 1.000        | 1.000        | 1.000        | NA           | -86.410      | -1664.112    | 552.624      |
| LV_HV:Jan-16 | 1.000        | 1.000        | 1.000        | 1.000        | 0.8879       | 1.000        | 1.000        | NA           | -1577.701    | 639.035      |
| LV_HV:Jul-16 | 1.000        | 1.000        | 1.000        | 1.000        | 1.000        | 1.000        | 1.000        | 1.000        | NA           | 2216.736     |
| MV_HV:Jul-15 | 1.000        | 1.000        | 1.000        | 1.000        | 1.000        | 1.000        | 1.000        | 1.000        | 1.000        | NA           |
| MV_HV:Jan-16 | 1.000        | 1.000        | 0.2455       | 1.000        | 1.000        | 0.1604       | 1.000        | 0.1604       | 1.000        | 1.000        |
| MV_HV:Jul-16 | 1.000        | 1.000        | 1.000        | 1.000        | 1.000        | 1.000        | 1.000        | 1.000        | 1.000        | 1.000        |
| MV_MV:Jul-15 | 1.000        | 1.000        | 1.000        | 1.000        | 1.000        | 0.8199       | 1.000        | 1.000        | 1.000        | 1.000        |
| MV_MV:Jan-16 | 1.000        | 1.000        | 1.000        | 1.000        | 0.1604       | 1.000        | 1.000        | 1.000        | 1.000        | 1.000        |
| MV_MV:Jul-16 | 1.000        | 1.000        | 1.000        | 1.000        | 1.000        | 1.000        | 1.000        | 1.000        | 1.000        | 1.000        |

**E. Adjusted p-values between Multiple Comparisons of *Cladocopium* ITS types in *G. retiformis* colonies**

|              | HV_HV:Jul-15 | HV_HV:Jan-16 | LV_HV:Jul-15 | LV_HV:Jan-16 | LV_LV:Jul-15 | LV_LV:Jan-16 | MV_HV:Jul-15 | MV_HV:Jan-16 | MV_MV:Jul-15 | MV_MV:Jan-16 |
|--------------|--------------|--------------|--------------|--------------|--------------|--------------|--------------|--------------|--------------|--------------|
| <b>C1</b>    |              |              |              |              |              |              |              |              |              |              |
| HV_HV:Jul-15 | NA           | 24.1244      | -1168.9859   | -7.5019      | -75.1456     | -60.2601     | -423.0424    | 24.6817      | -113.0263    | -5.8451      |
| HV_HV:Jan-16 | 0.5466       | NA           | -1193.1103   | -31.6263     | -99.2700     | -84.3845     | -447.1668    | 0.5572       | -137.1507    | -29.9695     |
| LV_HV:Jul-15 | 0.9997       | 0.9997       | NA           | 1161.4840    | 1093.8403    | 1108.7257    | 745.9434     | 1193.6680    | 1055.9596    | 1163.1408    |
| LV_HV:Jan-16 | 0.9997       | 0.4883       | 0.9997       | NA           | -67.6437     | -52.7583     | -415.5405    | 32.1835      | -105.5244    | 1.6568       |
| LV_LV:Jul-15 | 0.7368       | 0.6106       | 0.9997       | 0.8874       | NA           | 14.8854      | -347.8968    | 99.8272      | -37.8807     | 69.3005      |
| LV_LV:Jan-16 | 0.7132       | 0.3554       | 0.9997       | 0.7132       | 0.9997       | NA           | -362.7823    | 84.9418      | -52.7661     | 54.4151      |
| MV_HV:Jul-15 | 0.9997       | 0.9997       | 0.9997       | 0.9997       | 0.9997       | 0.9997       | NA           | 447.7241     | 310.0161     | 417.1974     |

|                     |                 |                 |            |           |                 |           |           |                 |                 |            |
|---------------------|-----------------|-----------------|------------|-----------|-----------------|-----------|-----------|-----------------|-----------------|------------|
| MV_HV:Jan-16        | 0.5320          | 0.9997          | 0.9997     | 0.4820    | 0.6106          | 0.3523    | 0.9997    | NA              | -137.7079       | -30.5267   |
| MV_MV:Jul-15        | 0.1105          | <b>0.001400</b> | 0.9997     | 0.1208    | 0.9997          | 0.6106    | 0.9997    | <b>0.001437</b> | NA              | 107.1812   |
| MV_MV:Jan-16        | 0.9997          | 0.3655          | 0.9997     | 0.9997    | 0.8874          | 0.7323    | 0.9997    | 0.3655          | 0.05363         | NA         |
| <b>C15</b>          |                 |                 |            |           |                 |           |           |                 |                 |            |
| HV_HV:Jul-15        | NA              | 0.7538          | 744.6356   | -49.2301  | 1.6292          | -46.5213  | 828.5051  | 2.1524          | -218.4267       | 3.0256     |
| HV_HV:Jan-16        | 0.9997          | NA              | 743.8818   | -49.9839  | 0.8754          | -47.2751  | 827.7513  | 1.3987          | -219.1805       | 2.2718     |
| LV_HV:Jul-15        | 0.9997          | 0.9997          | NA         | -793.8658 | -743.0064       | -791.1569 | 83.8694   | -742.4832       | -963.0623       | -741.6101  |
| LV_HV:Jan-16        | 0.5064          | 0.5064          | 0.9997     | NA        | 50.8593         | 2.7088    | 877.7352  | 51.3826         | -169.1966       | 52.2557    |
| LV_LV:Jul-15        | 0.9997          | 0.9997          | 0.9997     | 0.4993    | NA              | -48.1505  | 826.8758  | 0.5232          | -220.0559       | 1.3963     |
| LV_LV:Jan-16        | 0.3655          | 0.3655          | 0.9997     | 0.9997    | 0.3647          | NA        | 875.0263  | 48.6737         | -171.9054       | 49.5468    |
| MV_HV:Jul-15        | 0.9997          | 0.9997          | 0.9997     | 0.9997    | 0.9997          | 0.9997    | NA        | -826.3526       | -1046.9320      | -825.4795  |
| MV_HV:Jan-16        | 0.9997          | 0.9997          | 0.9997     | 0.4904    | 0.9997          | 0.3554    | 0.9997    | NA              | -220.5791       | 0.8731     |
| <b>MV_MV:Jul-15</b> | <b>0.001437</b> | <b>0.001437</b> | 0.9997     | 0.1110    | <b>0.001437</b> | 0.1082    | 0.9997    | <b>0.001437</b> | NA              | 221.4522   |
| <b>MV_MV:Jan-16</b> | <b>0.7323</b>   | <b>0.8874</b>   | 0.9997     | 0.4866    | 0.9997          | 0.3523    | 0.9997    | 0.9997          | <b>0.001437</b> | NA         |
| <b>C15b</b>         |                 |                 |            |           |                 |           |           |                 |                 |            |
| HV_HV:Jul-15        | NA              | -46.6837        | -1652.3083 | 9.5933    | -49.4357        | -69.9185  | 1166.9340 | 35.5739         | -29.5635        | 35.0848    |
| HV_HV:Jan-16        | 0.5064          | NA              | -1605.6246 | 56.2770   | -2.7521         | -23.2348  | 1213.6177 | 82.2575         | 17.1202         | 81.7685    |
| LV_HV:Jul-15        | 0.9997          | 0.9997          | NA         | 1661.9016 | 1602.8725       | 1582.3898 | 2819.2423 | 1687.8821       | 1622.7448       | 1687.3931  |
| LV_HV:Jan-16        | 0.9997          | 0.7568          | 0.9997     | NA        | -59.0290        | -79.5118  | 1157.3407 | 25.9806         | -39.1568        | 25.4915    |
| LV_LV:Jul-15        | 0.4255          | 0.9997          | 0.9997     | 0.6228    | NA              | -20.4827  | 1216.3697 | 85.0096         | 19.8723         | 84.5205    |
| LV_LV:Jan-16        | 0.3655          | 0.9997          | 0.9997     | 0.4896    | 0.9997          | NA        | 1236.8525 | 105.4924        | 40.3550         | 105.0033   |
| MV_HV:Jul-15        | 0.9997          | 0.9997          | 0.9997     | 0.9997    | 0.9997          | 0.9997    | NA        | -1131.3601      | -1196.4975      | -1131.8492 |
| MV_HV:Jan-16        | 0.3655          | 0.3655          | 0.9997     | 0.6106    | 0.3254          | 0.1082    | 0.9997    | NA              | -65.1373        | -0.4891    |
| MV_MV:Jul-15        | 0.9997          | 0.9997          | 0.9997     | 0.5064    | 0.9997          | 0.9997    | 0.9997    | 0.1491          | NA              | 64.6483    |
| MV_MV:Jan-16        | 0.3655          | 0.3655          | 0.9997     | 0.6106    | 0.3274          | 0.1082    | 0.9997    | 0.9997          | 0.1534          | NA         |
| <b>C21</b>          |                 |                 |            |           |                 |           |           |                 |                 |            |
| HV_HV:Jul-15        | NA              | 1.5364          | 137.5845   | -70.9126  | -47.0547        | -34.3445  | -117.3467 | -0.5148         | 0.3103          | -0.3785    |
| HV_HV:Jan-16        | 0.7220          | NA              | 136.0481   | -72.4490  | -48.5911        | -35.8809  | -118.8831 | -2.0512         | -1.2261         | -1.9149    |
| LV_HV:Jul-15        | 0.9997          | 0.9997          | NA         | -208.4972 | -184.6393       | -171.9291 | -254.9312 | -138.0993       | -137.2743       | -137.9631  |
| LV_HV:Jan-16        | 0.3655          | 0.3655          | 0.9997     | NA        | 23.8579         | 36.5681   | -46.4340  | 70.3979         | 71.2229         | 70.5341    |
| LV_LV:Jul-15        | 0.3655          | 0.3655          | 0.9997     | 0.9997    | NA              | 12.7102   | -70.2920  | 46.5400         | 47.3650         | 46.6762    |

|              |        |        |        |        |        |        |          |          |          |          |
|--------------|--------|--------|--------|--------|--------|--------|----------|----------|----------|----------|
| LV_LV:Jan-16 | 0.3720 | 0.3655 | 0.9997 | 0.9754 | 0.9997 | NA     | -83.0022 | 33.8298  | 34.6548  | 33.9660  |
| MV_HV:Jul-15 | 0.9997 | 0.9997 | 0.9997 | 0.9997 | 0.9997 | 0.9997 | NA       | 116.8319 | 117.6569 | 116.9682 |
| MV_HV:Jan-16 | 0.9997 | 0.5064 | 0.9997 | 0.3655 | 0.3655 | 0.3746 | 0.9997   | NA       | 0.8250   | 0.1362   |
| MV_MV:Jul-15 | 0.9997 | 0.9004 | 0.9997 | 0.3655 | 0.3655 | 0.3655 | 0.9997   | 0.9997   | NA       | -0.6888  |
| MV_MV:Jan-16 | 0.9997 | 0.4330 | 0.9997 | 0.3655 | 0.3655 | 0.3746 | 0.9997   | 0.9997   | 0.9997   | NA       |

**C3**

|                     |                 |                 |           |            |                 |            |           |            |            |            |
|---------------------|-----------------|-----------------|-----------|------------|-----------------|------------|-----------|------------|------------|------------|
| HV_HV:Jul-15        | NA              | 1.6633          | 1299.7742 | -38.5247   | -140.0756       | -22.8138   | 568.0491  | -2.1865    | -1.3394    | -1.4546    |
| HV_HV:Jan-16        | 0.9004          | NA              | 1298.1109 | -40.1881   | -141.7389       | -24.4771   | 566.3857  | -3.8499    | -3.0027    | -3.1180    |
| LV_HV:Jul-15        | 0.9997          | 0.9997          | NA        | -1338.2990 | -1439.8500      | -1322.5880 | -731.7252 | -1301.9608 | -1301.1136 | -1301.2289 |
| LV_HV:Jan-16        | 0.6087          | 0.5606          | 0.9997    | NA         | -101.5509       | 15.7110    | 606.5738  | 36.3382    | 37.1854    | 37.0701    |
| <b>LV_LV:Jul-15</b> | <b>0.006248</b> | <b>0.006248</b> | 0.9997    | 0.3655     | NA              | 117.2619   | 708.1247  | 137.8891   | 138.7362   | 138.6210   |
| LV_LV:Jan-16        | 0.5064          | 0.4778          | 0.9997    | 0.9997     | 0.0965          | NA         | 590.8628  | 20.6272    | 21.4744    | 21.3591    |
| MV_HV:Jul-15        | 0.9997          | 0.9997          | 0.9997    | 0.9997     | 0.9997          | 0.9997     | NA        | -570.2356  | -569.3884  | -569.5037  |
| MV_HV:Jan-16        | 0.7587          | 0.3655          | 0.9997    | 0.6251     | <b>0.006468</b> | 0.5821     | 0.9997    | NA         | 0.8472     | 0.7319     |
| <b>MV_MV:Jul-15</b> | 0.9997          | 0.5466          | 0.9997    | 0.6106     | <b>0.006248</b> | 0.5466     | 0.9997    | 0.9997     | NA         | -0.1153    |
| MV_MV:Jan-16        | 0.9997          | 0.4247          | 0.9997    | 0.6106     | <b>0.006248</b> | 0.5466     | 0.9997    | 0.9997     | 0.9997     | NA         |

**C40**

|                     |        |         |           |               |          |               |           |           |               |           |
|---------------------|--------|---------|-----------|---------------|----------|---------------|-----------|-----------|---------------|-----------|
| <b>HV_HV:Jul-15</b> | NA     | -0.0485 | -793.5264 | <b>0.0216</b> | -0.7061  | <b>0.0273</b> | 217.2640  | -1.7745   | <b>0.0278</b> | -2.7056   |
| HV_HV:Jan-16        | 0.9997 | NA      | -793.4779 | 0.0701        | -0.6576  | 0.0758        | 217.3125  | -1.7260   | 0.0762        | -2.6572   |
| LV_HV:Jul-15        | 0.9997 | 0.9997  | NA        | 793.5480      | 792.8203 | 793.5537      | 1010.7904 | 791.7519  | 793.5542      | 790.8208  |
| <b>LV_HV:Jan-16</b> | 0.9997 | 0.9997  | 0.9997    | NA            | -0.7277  | <b>0.0057</b> | 217.2424  | -1.7961   | <b>0.0062</b> | -2.7272   |
| LV_LV:Jul-15        | 0.9997 | 0.9997  | 0.9997    | 0.9997        | NA       | 0.7334        | 217.9701  | -1.0684   | 0.7339        | -1.9995   |
| LV_LV:Jan-16        | 0.9997 | 0.9997  | 0.9997    | 0.9997        | 0.9997   | NA            | 217.2367  | -1.8018   | <b>0.0005</b> | -2.7330   |
| MV_HV:Jul-15        | 0.9997 | 0.9997  | 0.9997    | 0.9997        | 0.9997   | 0.9997        | NA        | -219.0385 | -217.2363     | -219.9697 |
| MV_HV:Jan-16        | 0.3655 | 0.3746  | 0.9997    | 0.5466        | 0.8874   | 0.4255        | 0.9997    | NA        | 1.8023        | -0.9311   |
| MV_MV:Jul-15        | 0.9997 | 0.9997  | 0.9997    | 0.9997        | 0.9997   | 0.9997        | 0.9997    | 0.3655    | NA            | -2.7334   |
| MV_MV:Jan-16        | 0.1311 | 0.1308  | 0.9997    | 0.3554        | 0.4159   | 0.2170        | 0.9997    | 0.8874    | 0.1082        | NA        |

| MV_HV:Jan-16    | MV_HV:Jul-16 | MV_MV:Jul-15 | MV_MV:Jan-16 | MV_MV:Jul-16 |
|-----------------|--------------|--------------|--------------|--------------|
| 131.867         | 1884.519     | 78.980       | -65.404      | -4.765       |
| 164.920         | 1917.572     | 112.033      | -32.351      | 28.288       |
| 170.557         | 1923.209     | 117.670      | -26.714      | 33.925       |
| 199.558         | 1952.210     | 146.671      | 2.287        | 62.926       |
| 38.104          | 1790.756     | -14.782      | -159.167     | -98.528      |
| 244.172         | 1996.824     | 191.285      | 46.901       | 107.539      |
| 75.275          | 1827.927     | 22.388       | -121.996     | -61.357      |
| 161.685         | 1914.337     | 108.799      | -35.586      | 25.053       |
| 1739.386        | 3492.038     | 1686.500     | 1542.115     | 1602.754     |
| -477.349        | 1275.303     | -530.236     | -674.620     | -613.982     |
| NA              | 1752.652     | -52.887      | -197.271     | -136.632     |
| 1.000           | NA           | -1805.539    | -1949.923    | -1889.284    |
| 1.000           | 1.000        | NA           | -144.384     | -83.745      |
| <b>0.003706</b> | 1.000        | 1.000        | NA           | 60.639       |
| 1.000           | 1.000        | 1.000        | 1.000        | NA           |

**F. PERMANOVA of *Cladocopium* ITS types representing >1% in *P. lobata* samples**

Model: scores ~ origin\_dest \* time, Euclidean method

|                 | Df  | SumsOfSqs | MeanSqs | F.Model | R2     | Pr(>F) |
|-----------------|-----|-----------|---------|---------|--------|--------|
| origin_dest     | 4   | 1.5090    | 0.3773  | 0.5809  | 0.0237 | 0.7460 |
| time            | 3   | 1.1790    | 0.3929  | 0.6049  | 0.0185 | 0.6690 |
| origin_dest:tim | 8   | 3.8680    | 0.4835  | 0.7444  | 0.0607 | 0.6790 |
| Residuals       | 88  | 57.1580   | 0.6495  | 0.8971  |        |        |
| Total           | 103 | 63.7140   | 1.0000  |         |        |        |

---

**G. PERMANOVA of *Cladocopium* ITS types representing >1% in *G. retiformis* colonies**

---

Model: scores ~ origin\_dest \* time, Euclidean method

|                 | Df | SumsOfSqs | MeanSqs | F.Model | R2     | Pr(>F) |
|-----------------|----|-----------|---------|---------|--------|--------|
| origin_dest     | 4  | 269.21    | 67.3020 | 1.5783  | 0.1732 | 0.1580 |
| time            | 1  | 44.28     | 44.2810 | 1.0384  | 0.0285 | 0.3440 |
| origin_dest:tim | 2  | 175.13    | 87.5630 | 2.0534  | 0.1126 | 0.0980 |
| Residuals       | 25 | 1066.08   | 42.6430 | 0.6857  |        |        |
| Total           | 32 | 1554.69   | 1.0000  |         |        |        |

---
